# Prior dengue immunity enhances Zika virus infection of the maternal-fetal interface in rhesus macaques

C. M. Crooks<sup>1</sup>, A. M. Weiler<sup>2</sup>, S. L. Rybarczyk<sup>2,†</sup>, M. I. Bliss<sup>2</sup>, A. S. Jaeger<sup>3</sup>, M. E. Murphy<sup>4,‡</sup>, H. A. Simmons<sup>2</sup>, A. Mejia<sup>2</sup>, M. K. Fritsch<sup>5</sup>, J. M. Hayes<sup>2</sup>, J. C. Eickhoff<sup>6</sup>, A. M. Mitzey<sup>4</sup>, E. Razo<sup>7</sup>, K. M. Braun<sup>1</sup>, E. A. Brown<sup>1</sup>, K. Yamamoto<sup>5,§</sup>, P. M. Shepherd<sup>5</sup>, A. Possell<sup>2</sup>, K. Weaver<sup>2</sup>, K. M. Antony<sup>8</sup>, T. K. Morgan<sup>9,10</sup>, C. M. Newman<sup>5</sup>, D. M. Dudley<sup>5</sup>, N. Schultz-Darken<sup>2</sup>, E. Peterson<sup>2</sup>, L. C. Katzelnick<sup>11,||</sup>, A. Balmaseda<sup>12</sup>, E. Harris<sup>11</sup>, D. H. O'Connor<sup>2,5</sup>, E. L. Mohr<sup>7</sup>, T. G. Golos<sup>2,4,8</sup>, T. C. Friedrich<sup>1,2\*</sup>, and M. T. Aliota<sup>3\*</sup>

<sup>1</sup>Department of Pathobiological Sciences, University of Wisconsin-Madison, Madison, WI, USA

<sup>2</sup>Wisconsin National Primate Research Center, University of Wisconsin-Madison, Madison, WI, USA

<sup>3</sup>Department of Veterinary and Biomedical Sciences, University of Minnesota, Twin Cities, St. Paul, MN, USA

<sup>4</sup>Department of Comparative Biosciences, University of Wisconsin-Madison, Madison, WI, USA

<sup>5</sup>Department of Pathology and Laboratory Medicine, University of Wisconsin-Madison, Madison, WI, USA

<sup>6</sup>Department of Biostatistics and Medical Informatics, University of Wisconsin-Madison, Madison, WI, USA

<sup>7</sup>Department of Pediatrics, University of Wisconsin-Madison, Madison, WI, USA

<sup>8</sup>Department of Obstetrics and Gynecology, University of Wisconsin-Madison, Madison, WI, USA

<sup>9</sup>Department of Pathology, Oregon Health and Science University, Portland, OR, USA

<sup>10</sup>Department of Obstetrics and Gynecology, Oregon Health and Science University, Portland, OR, USA

<sup>11</sup>Division of Infectious Diseases and Vaccinology, University of California Berkeley, Berkeley, CA, USA

<sup>12</sup>Sustainable Sciences Institute, Managua, Nicaragua

\*Corresponding author, T.C. Friedrich, Email: [tfriedri@wisc.edu](mailto:tfriedri@wisc.edu)

\*Corresponding author, M.T. Aliota, Email: [mtaliota@umn.edu](mailto:mtaliota@umn.edu)

† Present address, Sierra L. Rybarczyk, Sangamo Therapeutics, Richmond, CA, USA

‡ Present address, Megan E. Murphy, HIV Prevention Department, Terros Health, Phoenix, AZ, USA

§ Present address, Keisuke Yamamoto, Touro College of Osteopathic Medicine, New York, NY, USA

|| Present address, Leah Katzelnick, National Institute of Allergy and Infectious Disease, Bethesda, MD, USA

43 **ABSTRACT**

44 Concerns have arisen that pre-existing immunity to dengue virus (DENV) could enhance  
45 Zika virus (ZIKV) disease, due to the homology between ZIKV and DENV and the  
46 observation of antibody-dependent enhancement (ADE) among DENV serotypes. To date,  
47 no study has examined the impact of pre-existing DENV immunity on ZIKV pathogenesis  
48 during pregnancy in a translational non-human primate model. Here we show that prior  
49 DENV-2 exposure enhanced ZIKV infection of maternal-fetal interface tissues in macaques.  
50 However, pre-existing DENV immunity had no detectable impact on ZIKV replication kinetics  
51 in maternal plasma, and all pregnancies progressed to term without adverse outcomes or  
52 gross fetal abnormalities detectable at delivery. Understanding the risks of ADE to pregnant  
53 women worldwide is critical as vaccines against DENV and ZIKV are developed and  
54 licensed and as DENV and ZIKV continue to circulate.

## 55 INTRODUCTION

56 Pre-existing immunity to one DENV serotype can enhance the severity of a secondary  
57 heterologous DENV infection, a phenomenon known as antibody-dependent enhancement  
58 (ADE) (1–3). ZIKV is genetically and antigenically closely related to DENV, raising the  
59 possibility that pre-existing DENV-specific antibodies might also modulate the severity of  
60 ZIKV infection. ADE is thought to occur when antibodies from a prior DENV infection bind to  
61 DENV virions and enhance uptake into Fc $\gamma$ -receptor bearing cells rather than neutralizing  
62 viral infectivity. This can lead to increased viral replication, a more robust inflammatory  
63 response, and more severe disease (1, 4, 5).

64  
65 Since the ZIKV outbreak in the Americas in 2015–2016, the potential role of DENV  
66 antibodies in ZIKV infection has been examined in a variety of *in vitro*, *in vivo*, and  
67 epidemiological studies. Studies in cell culture (6–13, 13–16) and immunocompromised  
68 mice (6, 7, 13, 17–19) have found a range of outcomes from enhancement of, to protection  
69 against, ZIKV infection. Data from non-human primates (NHP) and human cohorts support  
70 the growing consensus that prior DENV infection does not enhance ZIKV infection in non-  
71 pregnant individuals (20–29). However, DENV seroprevalence has been high in regions such  
72 as French Polynesia (>80%), Yap, and New Caledonia that subsequently experienced large-  
73 scale ZIKV outbreaks, suggesting that high DENV seroprevalence does not protect against  
74 ZIKV outbreaks in a population (30–33).

75  
76 The impact of prior DENV immunity on ZIKV pathogenesis during pregnancy remains  
77 unclear. Studies in placental macrophages (34), human placental explants (34–36), and both  
78 immunocompetent and immunocompromised pregnant mice (36, 37) have all demonstrated  
79 enhancement of ZIKV infection in the presence of DENV antibodies. Retrospective studies  
80 of pregnant women in South America did not identify an association between DENV  
81 antibodies and adverse fetal outcomes (38–40); however, a majority of women in these  
82 studies (>80%) had a prior DENV exposure, and outcomes could not be stratified by pre-  
83 existing anti-DENV titer. A retrospective study of microcephaly cases in Brazil indicated that  
84 there was reduced risk of microcephaly in areas with a DENV epidemic in the 6 years prior,  
85 but an increased risk of microcephaly in areas with a DENV epidemic >7 years prior,  
86 suggesting that the role of DENV-specific antibodies in modulating risk of congenital Zika  
87 syndrome (CZS) might change as antibody titers wane with time (41). Understanding the  
88 potential impact of DENV immunity on ZIKV outcomes in pregnant women is critical, as  
89 vaccines against DENV and ZIKV are being developed, licensed, and distributed (42–44).  
90 The rollout of Dengvaxia offers a cautionary tale, as vaccine-induced immunity led to more  
91 severe disease outcomes in seronegative individuals (45). If ZIKV acts functionally as a fifth  
92 serotype of DENV, then one would expect that this vaccine would also enhance Zika  
93 disease by the same mechanism. Therefore, understanding whether the severity of maternal  
94 and fetal ZIKV infection increases in pregnant, DENV-immune individuals should be a public  
95 health priority.

96

97 NHP development and placentation resemble those of humans more closely than these  
98 processes do in other animal models, making NHPs particularly relevant to understanding  
99 viral infections in pregnancy (46). Here we apply our established NHP model (47) to assess  
00 the impact of DENV immunity on ZIKV pathogenesis in pregnancy. We do not detect a role  
01 for DENV immunity in modulating fetal outcomes in ZIKV-infected pregnant macaques.  
02 However, previous exposure to DENV did appear to increase ZIKV infection in tissues of the  
03 maternal-fetal interface, a result that warrants further examination.

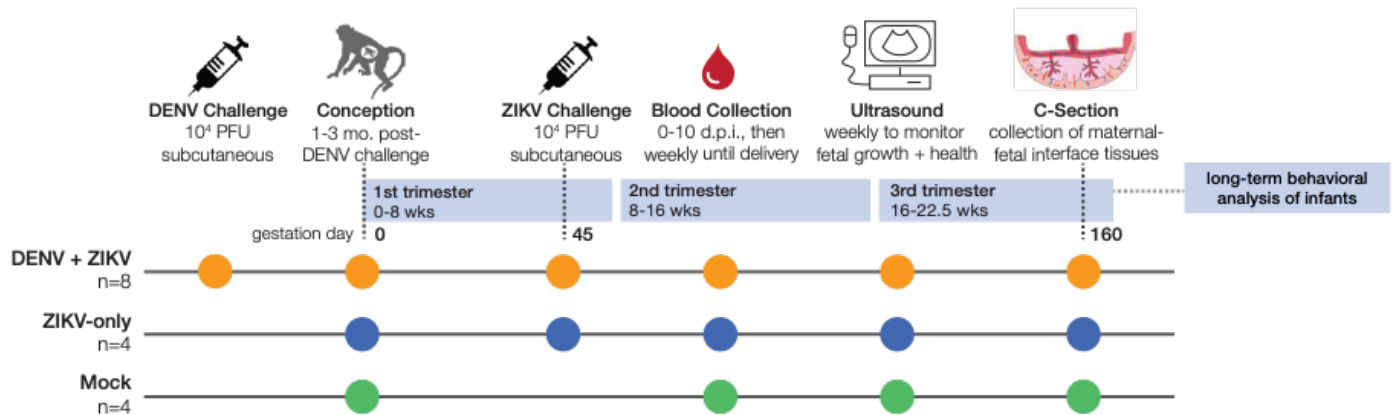

04 **Fig. 1. Experimental Overview.** A cohort of eight non-pregnant macaques were challenged with 10<sup>4</sup> PFU  
05 DENV-2 (orange). Approximately 1-3 months following DENV challenge, the eight DENV exposed macaques  
06 were bred, became pregnant, and were challenged with 10<sup>4</sup> PFU ZIKV-PRVABC59, an Asian-lineage ZIKV  
07 isolate, on gestational day 45. A cohort of four pregnant, DENV-naïve macaques (blue) were challenged with  
08 ZIKV-PRVABC59 on gestational day 45. A control cohort of four macaques (green) were mock-challenged with  
09 PBS on gestational day 45. All three cohorts underwent the same experimental protocols for blood collection  
10 and sedation for ultrasound. At approximately gestational day 160, infants were delivered via cesarean section,  
11 and a set of maternal-fetal interface tissues with maternal biopsies were collected. Infants were placed with  
12 their mothers for long-term behavioral analysis, data from which is part of a separate study.

## 15 RESULTS

### 16 Prior DENV immunity does not modulate ZIKV replication kinetics in plasma

17 To characterize the range of pathogenic outcomes of congenital ZIKV infection in DENV-  
18 immune animals, we subcutaneously (s.c.) inoculated a cohort of eight non-pregnant,  
19 Indian-origin rhesus macaques with 10<sup>4</sup> PFU of DENV-2/US/BID-V594/2006, a low-passage  
20 human isolate from Puerto Rico (Fig. 1). All eight macaques were productively infected with  
21 DENV-2, with peak plasma viral loads ranging from 10<sup>5</sup>-10<sup>7</sup> vRNA copies/mL occurring on  
22 days 2-3 post-infection (Fig. 2). Following a biphasic decline in viral loads, all macaques  
23 cleared infection by day 11 post-infection.

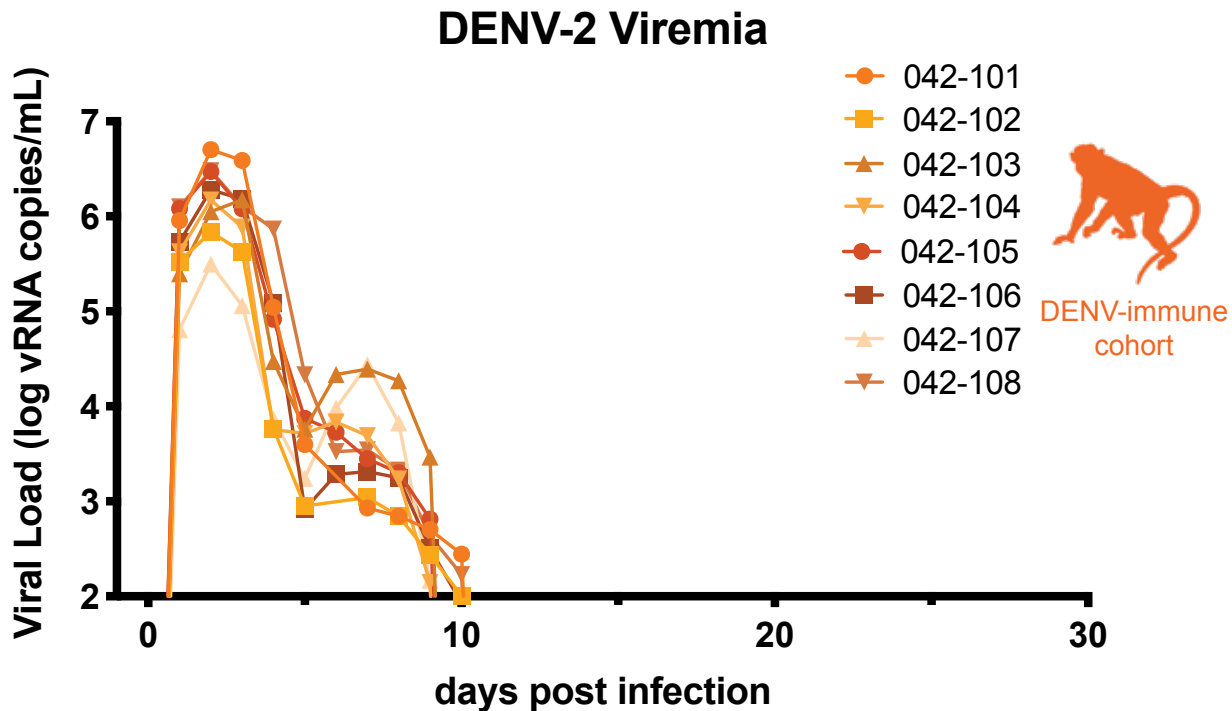

**Fig. 2. Replication of DENV-2.** Eight non-pregnant macaques were challenged with  $10^4$  PFU DENV-2/US/BID-V594/2006, a 2006 human isolate from Puerto Rico. QRT-PCR was performed on plasma samples from 0-10, 14, 21, and 28 days post-infection. All values above the limit of quantification for the QRT-PCR assay (100 copies vRNA/mL plasma) are shown.

Macaques were bred 1-3 months following DENV inoculation. Once they became pregnant, the animals were challenged with  $10^4$  PFU of ZIKV-PRVABC59 (ZIKV-PR), a human isolate from Puerto Rico, on gestational day 45 (late first trimester). ZIKV challenge was 84-119 days following DENV inoculation in each case. This cohort of eight DENV-immune macaques was compared to a cohort of four pregnant, DENV-naïve macaques that were inoculated with ZIKV-PR at gestational day 45 and a cohort of four pregnant, DENV-naïve macaques mock-challenged with phosphate-buffered saline (PBS) at gestational day 45. Following challenge, all three cohorts (DENV-immune, DENV-naïve, and mock) underwent the same blood sampling and fetal monitoring protocols (Fig. 1). All macaques inoculated with ZIKV were productively infected. Peak plasma viremia occurred on days 2-4 post-infection, with titers ranging from  $10^4$ - $10^5$  vRNA copies/mL in DENV-immune animals and  $10^3$ - $10^5$  vRNA copies/mL in DENV-naïve animals (Fig. 3A, 3B). An unpaired t-test did not reveal significant differences between cohorts in the peak, area under the curve, or duration of viremia (Fig. 3C). Since prolonged ZIKV viremia >21 days is only observed in pregnancy, we assessed differences in duration both as a continuous variable and as a binary with viremia greater than or less than 21 days. This suggests that prior DENV-2 immunity did not alter ZIKV replication kinetics during gestation.

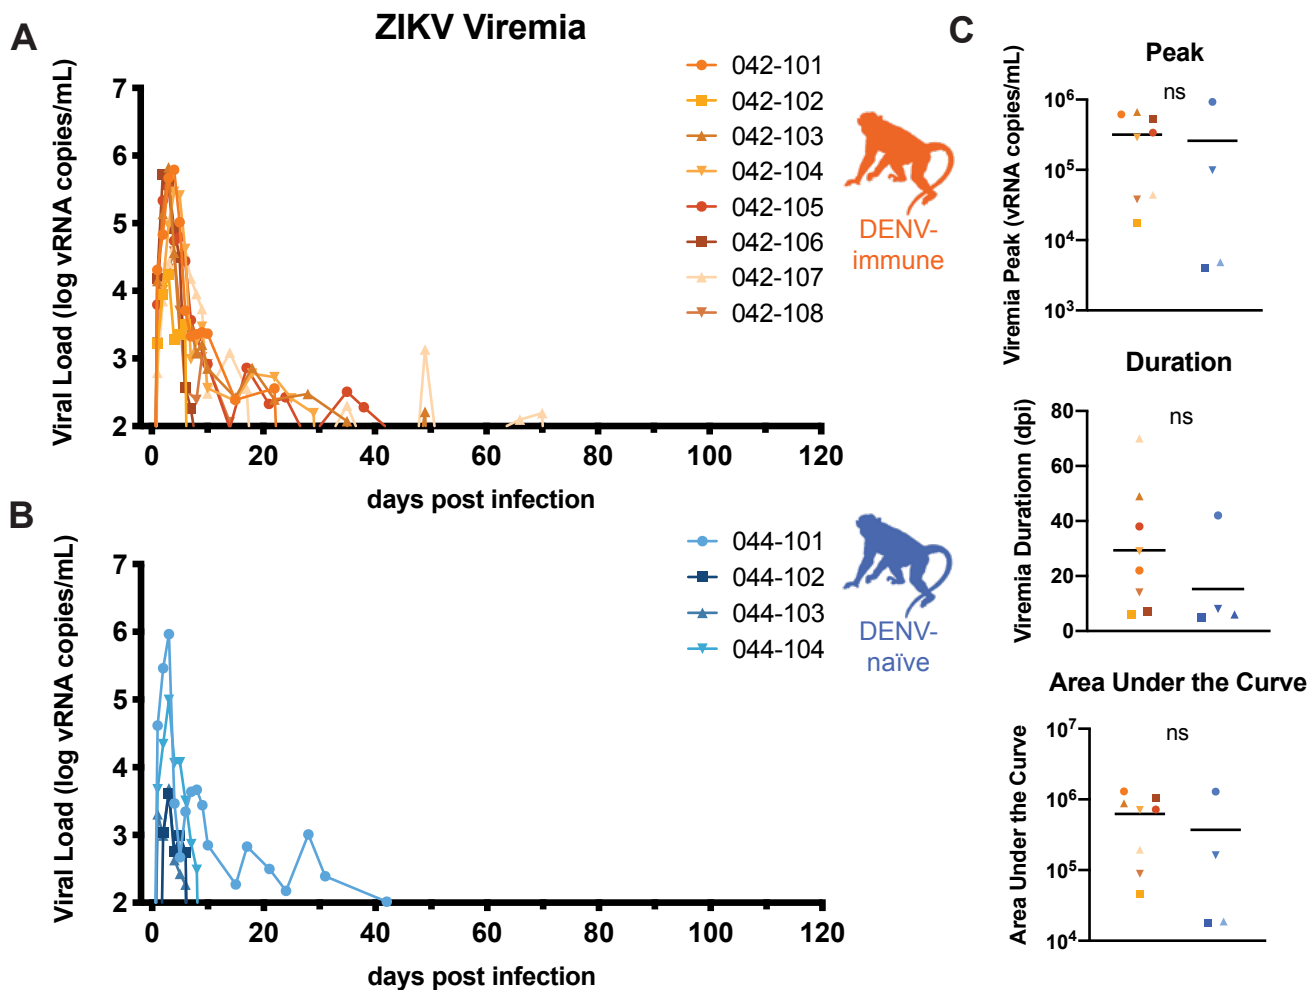

**Fig. 3. ZIKV replication kinetics.** Eight DENV-immune (A, orange) and four DENV-naïve (B, blue) macaques were challenged with  $10^4$  PFU of ZIKV-PRVABC59 at gestation day 45, which is late in the first trimester. Viral loads were assessed from plasma samples with ZIKV-specific QRT-PCR. All values above the limit of quantification (100 copies vRNA, mL plasma) are shown above. C. Graphs of the values for the peak, duration, and area under the curve of viremia for both DENV-immune and DENV-naïve macaques. An unpaired t-test was used for statistical comparison; ns = not significant ( $p > 0.05$ ). Only values above the limit of quantification were used in statistical analyses.

### DENV-immune macaques have low levels of ZIKV cross-reactive antibodies present at the time of challenge

For DENV-1-4, specific antibody titer ranges have been shown to enhance viral replication. As measured by a DENV inhibition ELISA (iELISA) assay, an intermediate antibody titer range of 1:21-1:80 was associated with a greater risk of developing severe dengue disease upon secondary exposure in a human cohort study (2). In a separate human cohort study, a plaque reduction neutralization test (PRNT50) titer of  $<1:100$  was associated with an increased risk of severe DENV disease upon secondary exposure (48). In order to assess how cross-reactive DENV antibodies impact ZIKV outcomes during pregnancy, we characterized DENV and ZIKV antibody dynamics throughout the experimental time course.

68 We collected serum samples from macaques at 28 days post-DENV challenge, the day of  
69 ZIKV challenge, 28-35 days post-ZIKV challenge, and the day of c-section for measuring  
70 antibody responses to DENV and ZIKV. We used PRNT and iELISA to measure neutralizing  
71 antibodies or binding antibodies, respectively. In the PRNT, serial dilutions of serum  
72 antibodies are incubated with DENV or ZIKV, plated on a confluent monolayer of cells, and  
73 assessed for the dilution of antibodies required to reduce plaques by 50 or 90 percent  
74 (Supplementary Fig. 1). In iELISA, serum is serially diluted with peroxidase-conjugated  
75 DENV- or ZIKV-specific antibodies, which compete for binding to either an equal mixture of  
76 DENV1-4 antigens or ZIKV antigen (2, 49). Due to the impact of COVID-19, only 4 of 8  
77 DENV-immune macaques were assayed via iELISA.

78  
79 At 28 days post-DENV challenge, all eight macaques seroconverted and developed a robust  
80 antibody response to DENV-2 as measured by both DENV PRNT and DENV iELISA (Fig. 4A,  
81 4C, 4D). At this time point, all macaques also showed a cross-reactive antibody response to  
82 ZIKV in one or both assays (3 of 4 macaques by iELISA and 7 of 8 macaques by PRNT),  
83 although generally below levels considered to be protective against subsequent ZIKV  
84 challenge (Fig. 4B, 4E, 4F)(50).

85  
86 At the time of the ZIKV challenge, which fell 84-119 days after primary DENV infection, the  
87 DENV iELISA titers had increased four-fold in 6 of the 8 DENV-exposed macaques by PRNT  
88 and 4 of 4 macaques by iELISA (Fig. 4G, 4I, 4J). The cross-reactive ZIKV antibody titers  
89 remained stable or increased only modestly via ZIKV iELISA assay and PRNT (Fig. 4H, 4K,  
90 4L) in the majority of macaques. However, cross-reactive ZIKV antibodies became  
91 undetectable by PRNT in 3 of 4 macaques that previously showed cross-reactivity at 28  
92 days post-DENV challenge (Fig. 4K, 4L). By using both assays, we detected low levels of  
93 cross-reactive antibodies to ZIKV at the time of ZIKV challenge in all DENV-immune  
94 macaques; 2 of 4 macaques had ZIKV iELISA titers that fell within the range 1:21-1:80,  
95 which has previously been shown to increase risk of more severe DENV disease in humans.  
96 At the time of ZIKV challenge, no antibody responses to either ZIKV or DENV were detected  
97 using either assay in the DENV-naïve macaques (Fig. 4G, 4H, 4K, 4L).

98  
99 Between 28-35 days post-ZIKV challenge, DENV antibody titers increased approximately  
00 four-fold following ZIKV challenge in DENV-immune macaques, as assessed by both DENV  
01 iELISA and PRNT (Fig. 4M, 4O, 4P). DENV titers in DENV-naïve macaques were only  
02 assessed via DENV iELISA, which revealed essentially no evidence of cross-reactive DENV  
03 antibodies, with a low-level antibody titer (1:11) to DENV in only 1 of 4 macaques (Fig. 4M).  
04 By 28-35 days post-ZIKV challenge, both DENV-immune and DENV-naïve macaques  
05 developed robust ZIKV-specific responses as measured by both ZIKV iELISA and PRNT  
06 (Fig. 4N, 4Q, 4R). Macaques in both cohorts that had viremia for a duration of >21 days  
07 (042-101, 042-103, 042-104, 044-101) developed antibody titers more than four-fold higher  
08 than those animals that had viremia for a duration of <21 days (042-102, 044-102, 044-103,  
09 044-104) as determined by ZIKV iELISA. PRNT<sub>50</sub> titers were significantly higher ( $p=0.0095$ )

10 in DENV-immune macaques than DENV-naïve animals 28-35 days after ZIKV challenge, but  
 11 no significant differences were noted in PRNT90 titers between groups. Together, these  
 12 data provide evidence that antibodies capable of cross-reacting with ZIKV were present at  
 13 the time of ZIKV challenge in DENV immune animals and show that all animals, regardless of  
 14 DENV exposure history, develop a robust antibody response to ZIKV.

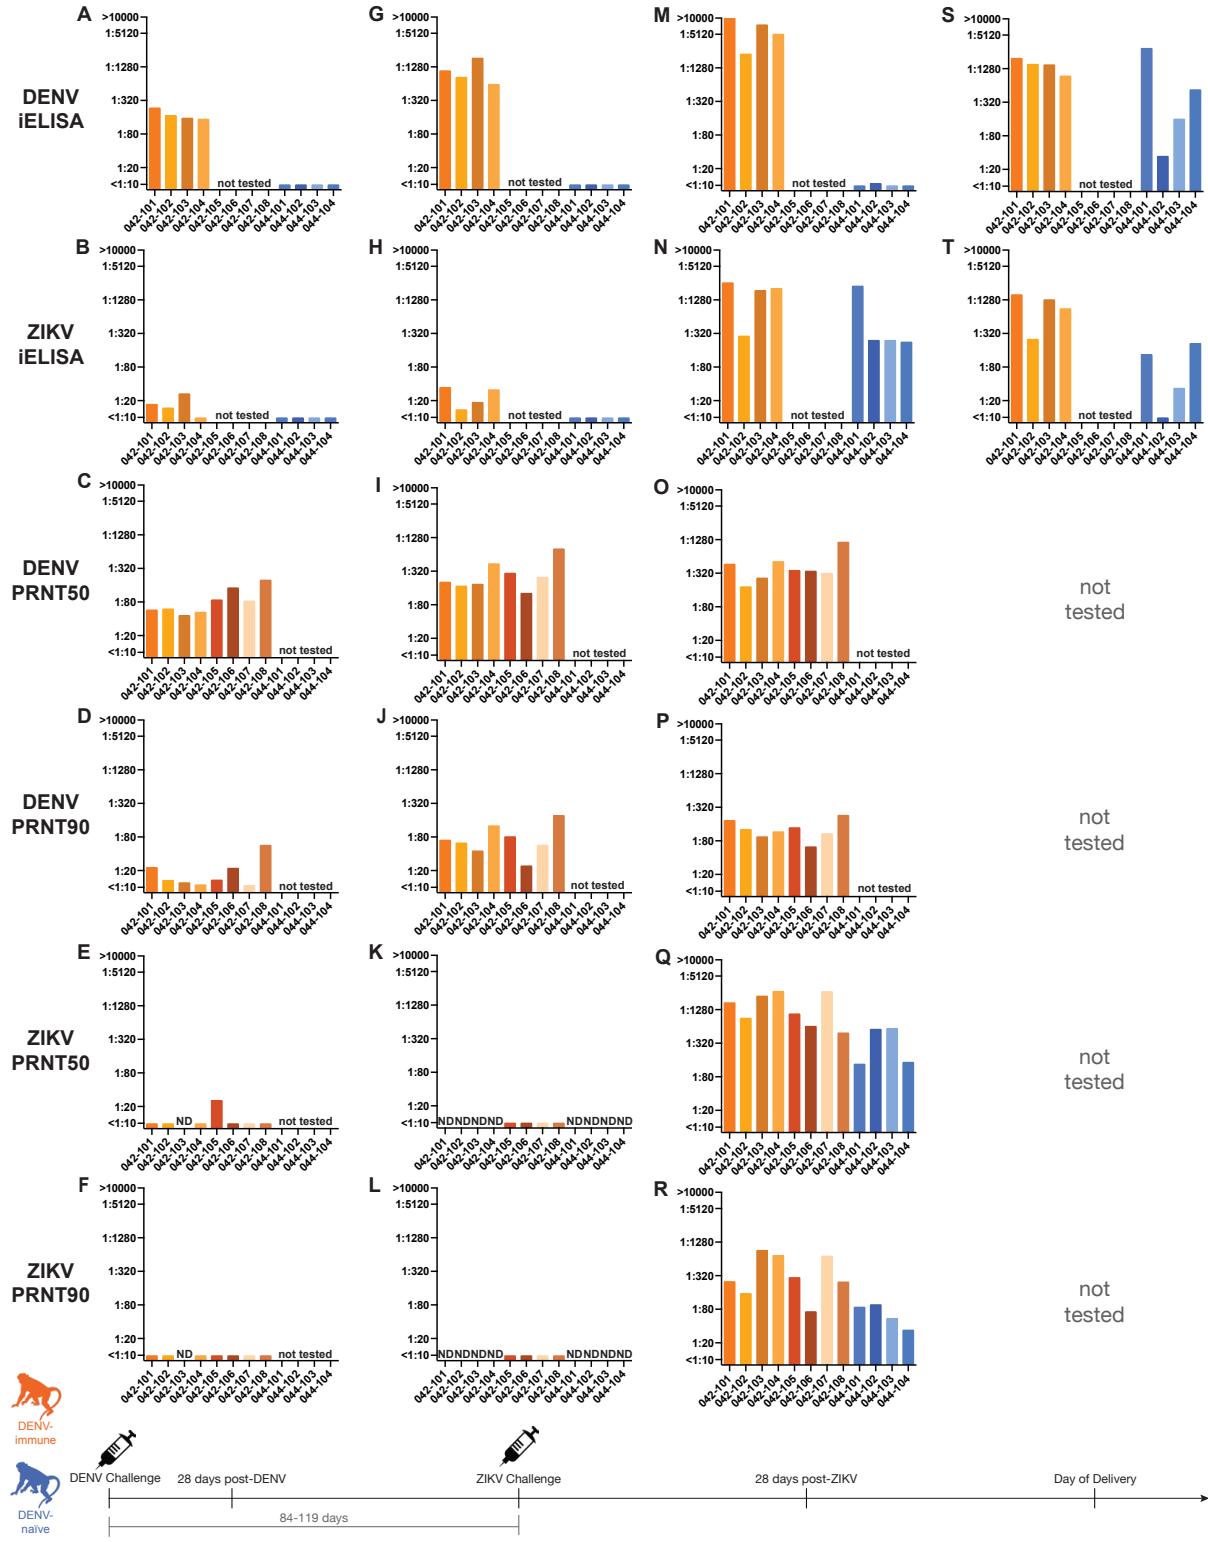



17 **Fig. 4. DENV and ZIKV antibody dynamics.** iELISA titers against DENV and ZIKV 28 days post-DENV  
18 challenge (A-F), the day of ZIKV challenge (G-L), 28-35 days post ZIKV challenge (M-Q), and the day of  
19 delivery (S-T). iELISA titers from DENV-immune animals shown in orange and from DENV-naïve animals shown  
20 in blue. Samples labeled “ND” were not detected. Using an unpaired t-test, PRNT50, but not PRNT90, titers  
21 from the DENV-immune group were significantly higher than the PRNT50 titer of DENV-naïve animals at 28  
22 days post-ZIKV-challenge (\*\* $p < 0.01$ ). Neutralization curves can be found in Supplementary Fig. 1.

#### 23 24 **No evidence of fetal growth restriction during gestation**

25 To further characterize pathogenic outcomes during pregnancy, we define fetal health and  
26 growth parameters throughout gestation. No gross abnormalities, such as microcephaly,  
27 missing limbs, or hydrops fetalis were noted in any animals during gestation. Head  
28 circumference and biparietal diameter measurements were used to assess head size; femur  
29 length and abdominal circumference were used to assess overall fetal growth. Fetal  
30 measurements were compared to previously collected normative data on fetal growth  
31 trajectories in 55 pregnant rhesus macaques (51, 52). A z-score (number of standard  
32 deviations from the normative data) was calculated for each measurement at each  
33 timepoint. To account for animal-specific differences, z-scores were plotted as the change  
34 from the baseline measurement (open circles, Fig. 5). Overall group growth trajectories were  
35 calculated (solid line, Fig. 5) and used for statistical comparisons. Only the biparietal  
36 diameter of the mock-infected cohort was significantly lower than the normative data  
37 ( $p = 0.01713$ ). There were no significant differences noted in pairwise comparisons of growth  
38 trajectories between groups. Taken together, these extensive fetal growth measurements  
39 suggest that there was no significant reduction in fetal growth in ZIKV-exposed macaques,  
40 regardless of their DENV immune history.

#### 41 42 **No evidence of vertical transmission in either DENV-immune or DENV-naïve macaques**

43 At approximately gestational day 160 (term = gestational day 165), infants were delivered via  
44 cesarean section. During the surgery, a biopsy of the maternal mesenteric lymph node was  
45 taken to look for ZIKV vRNA in the dam. None of the mesenteric lymph node biopsies were  
46 positive in the DENV-immune cohort and only one of four mesenteric lymph node biopsies  
47 was positive in the DENV-naïve cohort, a difference which was not significant  
48 (Supplementary Table 1). Fetal tissues are not available for virological analysis because  
49 infants were placed with their mothers for long-term behavioral analysis, data from which  
50 will be part of a forthcoming study. We collected fetal plasma, umbilical cord plasma, and  
51 amniotic fluid; none of the fluid samples from infants in either cohort tested positive for ZIKV  
52 vRNA (Supplementary Table 1). There was no robust evidence to support direct infection of  
53 the fetus in either cohort, although the possibility of vertical transmission with viral clearance  
54 by the time of delivery cannot be ruled out.

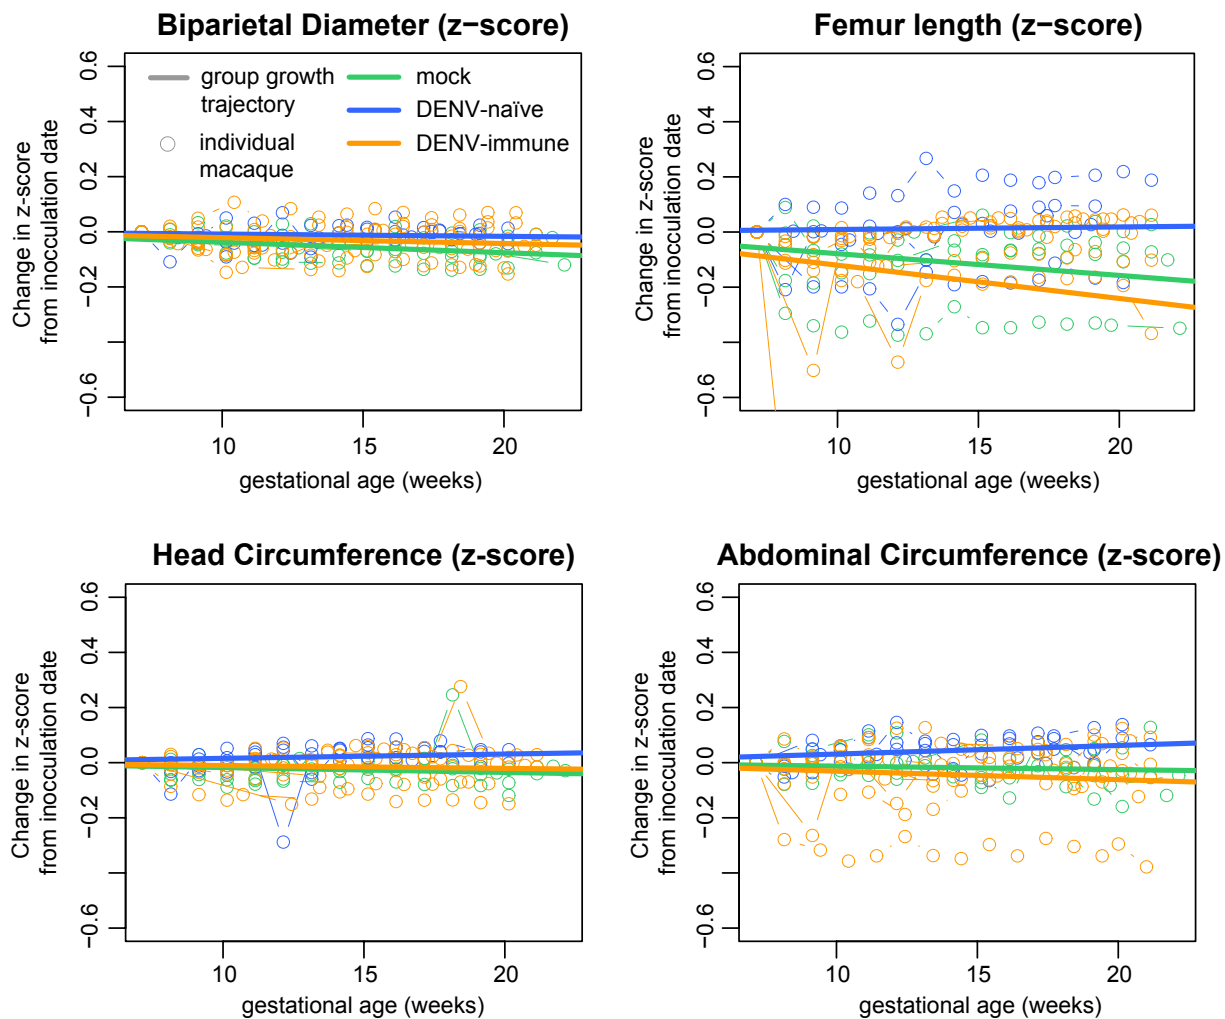

55  
56 **Fig. 5. Fetal Growth.** Comprehensive ultrasounds were performed weekly throughout gestation to monitor  
57 fetal health and perform four measurements of fetal growth: biparietal diameter and head circumference to  
58 evaluate head size; abdominal circumference and femur length to evaluate overall fetal growth. Using  
59 normative data from the California National Primate Research Center, a z-score was calculated for each  
60 measurement and the change in z-score from baseline is plotted for each measurement with an open circle.  
61 The overall growth trajectory for each group was quantified by calculating the regression slope parameters  
62 from baseline (solid line). When compared to the normative data, mock-infected animals had significantly  
63 reduced biparietal diameter growth ( $p=0.01713$ ). No other significant differences were detected in  
64 comparisons to the normative data or in comparisons between the experimental groups.

### 65 66 **Enhanced infection of the maternal-fetal interface in DENV-immune macaques**

67 We performed an extensive dissection of both discs of the placenta in order to understand  
68 the distribution of ZIKV in placental tissues. Positive tissue samples were detected above  
69 the theoretical limit of detection of our QRT-PCR assay in 5 of 8 DENV-immune macaques  
70 and only 1 of 4 DENV-naïve macaques (Fig. 6A). Using a Mann-Whitney U test, there was a  
71 significantly higher burden of ZIKV RNA in the chorionic plate in the DENV-immune group as  
72 compared to the DENV-naïve group ( $p<0.01$ ). Although there was a trend toward a greater  
73 burden of ZIKV in the fetal membranes in DENV-immune macaques, there were no  
74 statistically significant differences between cohorts in vRNA burden in the other MFI tissues  
75 (decidua, chorionic villi, umbilical cord, fetal membranes, and uterine placental bed). The

76 highest ZIKV RNA burden detected in a fetal membrane sample was from DENV-immune  
 77 animal 042-104, which had a viral load of  $1.03 \times 10^5$  vRNA copies/ml. We could not recover  
 78 infectious virus from this specimen; we did not attempt virus isolation from other specimens,  
 79 which had much lower viral loads ( $<10^3$  copies/mg).  
 80

81 To determine whether the presence of vRNA in the MFI was associated with duration, peak,  
 82 or area under the curve of viremia, we performed a Pearson correlation analysis. When  
 83 prolonged viremia was defined as  $>21$  days and non-prolonged viremia as  $<21$  days (Fig.  
 84 6B) there was a significant positive correlation between prolonged viremia and presence of  
 85 vRNA in the MFI for both the DENV-immune and DENV-naïve cohorts. When viremia is  
 86 assessed as a continuous variable, the correlation is no longer significant for the DENV-  
 87 immune cohort (Fig. 6C). There was a significant correlation between area under the curve  
 88 and presence of vRNA in the MFI in both cohorts (Fig. 6D, 6E). There was a significant  
 89 correlation between peak viremia and presence of vRNA in the MFI only in DENV-naïve  
 90 animals (Fig. 6E).

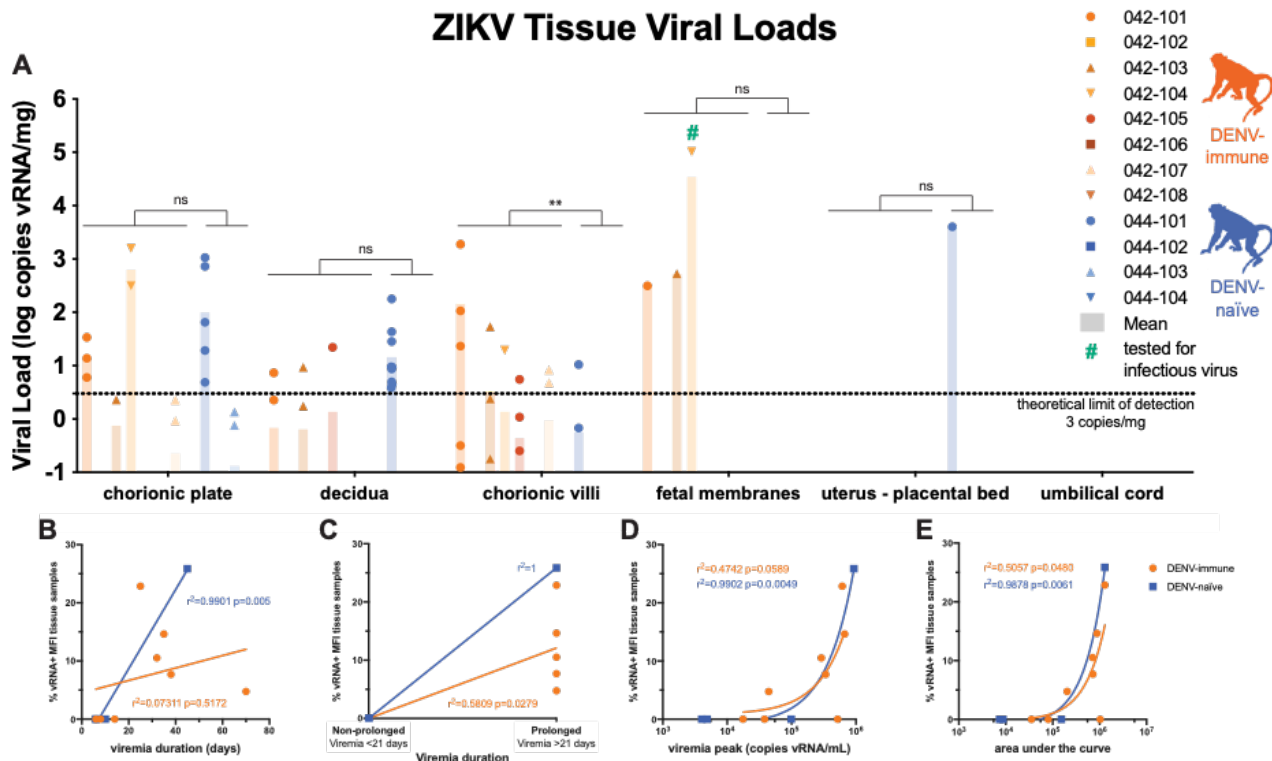

91  
 92 **Fig. 6. Maternal-Fetal Interface Viral Loads.** All tissue samples were tested for the presence of viral RNA  
 93 using ZIKV-specific QRT-PCR. A. All tissues  $>0.1$  copy vRNA/mg tissue are shown above; only tissues with  
 94 viral loads greater than the theoretical limit of quantification (3 copies vRNA/mg) were used for statistical  
 95 analysis. A Mann-Whitney U test was used to assess statistically significant differences between the  
 96 experimental groups (\*\* $p<0.01$ ). B-E. Pearson correlation analysis was performed to assess correlation  
 97 between the percent of tissues collected that were vRNA positive and the duration (B and C), peak (D), and  
 98 area under the curve (E) of viremia.  
 99

## 00 **More-severe histopathological changes inconsistently detected in DENV-immune** 01 **macaques**

02 Placental insufficiency due to virus-mediated damage could lead to poor fetal outcomes  
03 (53). In order to assess the impact of ZIKV infection on MFI health, we quantified  
04 inflammation and infarctions within the MFI. Qualitative pathological findings included  
05 transmural infarctions and neutrophilic deciduitis in the central cross-section of both  
06 placental discs examined, but these findings were observed in animals of all groups,  
07 including mock-infected animals, with no consistent patterns distinguishing groups. In order  
08 to quantitatively analyze placental pathology and identify any trends within and between  
09 cohorts, the center section of each placental disc was scored for 22 pathologic changes  
10 associated with fetal vascular malperfusion, maternal vascular malperfusion, and  
11 generalized placental disease (Supplementary Table 2). DENV-immune macaques had  
12 significantly higher scores in four pathologic changes in disc 1 (% transmural infarction,  
13 chronic villitis, avascular villi, and chronic retroplacental hemorrhage) and one pathologic  
14 change in disc 2 (chronic villitis) as compared to the mock-infected cohort (Supplemental  
15 Fig. 2) There were no significant differences between DENV-naïve animals and mock-  
16 infected animals.

17  
18 **Table 1. Placental cotyledon pathology**

| Group       | Dam     | % CHIV+ cotyledons | Infarcted cotyledons/total cotyledons (%) | Villous stromal calcifications (present/absent) | Vasculopathy (present/absent) | Placental weight (g) |
|-------------|---------|--------------------|-------------------------------------------|-------------------------------------------------|-------------------------------|----------------------|
| Mock        | 044-105 | 0.0                | <b>5.88</b>                               | <b>Present</b>                                  | Absent                        | 111.08               |
|             | 044-106 | 0.0                | <b>12.5</b>                               | <b>Present</b>                                  | Absent                        | 106.5                |
|             | 044-107 | 0.0                | 0.0                                       | <b>Present</b>                                  | <b>Present</b>                | 144.48               |
|             | 044-108 | 0.0                | <b>45.5</b>                               | <b>Present</b>                                  | Absent                        | 122.92               |
| DENV-naïve  | 044-101 | 0.0                | <b>25.0</b>                               | <b>Present</b>                                  | Absent                        | 172.59               |
|             | 044-102 | 0.0                | <b>33.3</b>                               | <b>Present</b>                                  | Absent                        | 123.87               |
|             | 044-103 | 0.0                | 0.0                                       | Absent                                          | Absent                        | 134.49               |
|             | 044-104 | 0.0                | <b>18.2</b>                               | Absent                                          | Absent                        | 120.48               |
| DENV-immune | 042-101 | 0.0                | <b>21.43</b>                              | <b>Present</b>                                  | Absent                        | 104.4                |
|             | 042-102 | <b>7.69</b>        | <b>7.69</b>                               | <b>Present</b>                                  | Absent                        | 111.9                |
|             | 042-103 | 0.0                | 0.00                                      | <b>Present</b>                                  | Absent                        | 120.06               |
|             | 042-104 | 0.0                | <b>26.67</b>                              | <b>Present</b>                                  | Absent                        | 95.33                |
|             | 042-105 | 0.0                | <b>25.00</b>                              | Absent                                          | Absent                        | 119.97               |
|             | 042-106 | 0.0                | <b>53.33</b>                              | <b>Present</b>                                  | <b>Present</b>                | 120.14               |
|             | 042-107 | 0.0                | <b>28.57</b>                              | <b>Present</b>                                  | Absent                        | 139.74               |
|             | 042-108 | 0.0                | <b>33.33</b>                              | <b>Present</b>                                  | Absent                        | 129.54               |

19

20 We also assessed a cross-section of each of the individual placental cotyledons, including  
21 the decidua basalis, for the presence of chronic histiocytic intervillitis (CHIV), infarctions,  
22 villous stromal calcifications, and vasculopathy (Table 1). Although infarctions and villous  
23 stromal calcifications were present in DENV-immune and DENV-naïve macaques, they were  
24 also present in mock-infected animals. There were no statistically significant differences  
25 between any of the groups for any of these pathologic features or placental weight. This  
26 suggests that the presence of some changes, such as multifocal areas of villous  
27 mineralization, may be a result of normal placental aging or a result of stress from  
28 experimental procedures, rather than from viral infection. These data underscore the  
29 necessity of mock-infected controls when assessing pathology.

30

## 31 **DISCUSSION**

32 This study provides the first comprehensive assessment of the impact of pre-existing DENV  
33 immunity on ZIKV pathogenesis during pregnancy in a translational NHP model. Macaques  
34 with previous DENV-2 infection supported robust replication of ZIKV and developed a  
35 robust neutralizing antibody response to ZIKV, suggesting that primary DENV-2 infection  
36 had no protective effect. We did not observe evidence of enhanced ZIKV replication in  
37 DENV-immune macaques as compared to DENV-naïve macaques. Neither intrauterine  
38 growth restriction nor adverse fetal outcomes were observed in either cohort. However, we  
39 did observe ZIKV RNA in the MFI in a greater number of DENV-immune macaques and a  
40 significantly greater burden of ZIKV RNA in the chorionic plate in DENV-immune macaques  
41 as compared to DENV-naïve macaques. Although we do not have any evidence of direct  
42 fetal infection, the increased presence of ZIKV in the chorionic plate in DENV-immune  
43 macaques suggests that the virus is capable of crossing the placental barrier and reaching  
44 the chorionic plate, which is on the fetal side of the placenta (54). This enhanced infection is  
45 consistent with prior studies that have shown increased replication of ZIKV in the placenta  
46 of mice and placental cells in the presence of DENV antibodies (34, 36, 37). The implications  
47 of increased infection of the placenta on fetal outcomes is unclear, since we observed no  
48 fetal demise nor any of the other clinical sequelae associated with CZS in offspring. This  
49 also suggests that the presence of ZIKV in the maternal-fetal interface is not a robust  
50 indicator of significant fetal harm in this model. Future studies will define the effects of  
51 DENV and ZIKV on infant outcomes, as developmental deficits are the most common  
52 adverse outcome of prenatal ZIKV exposure in humans (55).

53

54 We did observe an association between prolonged viremia, defined as lasting >21 days, and  
55 the presence of ZIKV vRNA in the maternal-fetal interface. Since 5 of 8 DENV-immune  
56 macaques had viremia greater than 21 days, while only 1 of 4 DENV-naïve animals did, it is  
57 tempting to speculate that prior DENV immunity may lead to longer viral replication and  
58 therefore greater ZIKV burden in the placenta. However, since we did not observe any  
59 statistically significant differences in the duration of viremia between the two groups,

perhaps due to a small sample size, we cannot make any definitive conclusions about the impact of prior DENV immunity on the duration of ZIKV viremia.

A significant strength of this study was our ability to assess ZIKV pathogenesis in a translational model in macaques with known infection histories. This allowed us to report detailed antibody dynamics throughout the course of infection, historical data that can be challenging to obtain in human cohort studies particularly during pregnancy. We confirmed the presence of low levels of cross-reactive antibodies present at the time of ZIKV challenge in our DENV-immune cohort. Twenty-eight days after ZIKV-challenge, we determined that PRNT50, but not PRNT90, titers were significantly higher in our DENV-immune cohort. We were particularly interested in this finding, since a higher ZIKV neutralization titer at the time of delivery has been associated with CZS in human cohort studies (39). However, at the time of delivery there were no significant differences in iELISA titers between cohorts.

As is common to non-human primate studies, ethical and financial constraints limited the number of variables that we were able to test in this study. A significant limitation of this study is the small group sizes used. Since the most severe effects of ZIKV only occur in a minority of cases, it is difficult to model the full spectrum of disease that women experience when infected with ZIKV during pregnancy. Small group sizes further limited our statistical power to detect significant differences between groups. In this study, we only tested a single DENV serotype; there is considerable evidence that the sequence of infecting DENV serotypes has an effect on subsequent enhancement or protection (for review see (20)). There is also considerable evidence that the pre-existing antibody titer at the time of secondary infection is associated with the risk of developing severe disease (2, 48). In this study, we had a relatively short window (1-3 months) between DENV and ZIKV infection, and a different interval between infection may have affected the titer of cross-reactive antibodies present at the time of ZIKV challenge. We tested a single ZIKV isolate, dose, and inoculation time point in gestation; changes to any of these parameters could have elicited more significant differences in maternal or fetal outcomes.

The relationship between flavivirus antibodies and disease outcomes is complex, depending on factors including antibody titer, specificity, and degree of sequence conservation among viruses. It is therefore difficult to comprehensively disentangle all these factors in a single experiment. More work is needed to understand the relationship between DENV immunity, viral infection of the placenta, and prolonged viremia. While there is a growing consensus that DENV may not enhance ZIKV in non-pregnant individuals, this study provides evidence that more research is needed to understand the risks associated with prior DENV immunity on ZIKV pathogenesis in pregnancy.

## 99 **METHODS**

### 00 **Experimental design**

01 This study was designed to assess the impact of pre-existing DENV immunity on ZIKV  
02 pathogenesis during pregnancy in a non-human primate model. Eight female non-pregnant  
03 Indian origin rhesus macaques (*Macaca mulatta*) were inoculated subcutaneously with  $1 \times 10^4$   
04 PFU of DENV-2/US/BID-V594/2006. Approximately 1-3 months following DENV challenge,  
05 macaques were bred and became pregnant. All eight macaques were then inoculated  
06 subcutaneously with  $1 \times 10^4$  PFU of ZIKV-PRVABC59 (ZIKV-PR) between 44-50 days of  
07 gestation (term is  $165 \pm 10$  days). Macaques were monitored throughout the remainder of  
08 gestation. At approximately gestation day 160, infants were delivered via cesarean section  
09 and monitored for long-term development. A comprehensive set of maternal biopsies and  
10 maternal-fetal interface were collected for analysis. For the DENV-naïve group, four  
11 pregnant Indian origin rhesus macaques (*Macaca mulatta*) were inoculated subcutaneously  
12 with  $1 \times 10^4$  PFU of ZIKV-PR between 44-50 days of gestation (term is  $165 \pm 10$  days).  
13 Macaques were monitored throughout the remainder of gestation. At approximately  
14 gestation day 160, infants were delivered via cesarean section and monitored for long-term  
15 development. A comprehensive set of maternal biopsies and maternal-fetal interface were  
16 collected for analysis. A cohort of four pregnant PBS-inoculated animals served as a control  
17 group and underwent the same experimental regimen, including the sedation for all blood  
18 draws and ultrasounds, as the ZIKV-infected cohort. In order to minimize the number of  
19 animals used in studies of ZIKV pathogenesis, the DENV-naïve and mock-infected cohort  
20 have served as a control group for other studies (56).

### 21 **Ethical approval**

22 This study was approved by the University of Wisconsin College of Letters and Sciences  
23 and Vice Chancellor for Research and Graduate Education Centers Institutional Animal Care  
24 and Use Committee (Protocol numbers: G005401 and G006139).

### 25 **Care and use of macaques**

26 All macaque monkeys used in this study were cared for by the staff at the WNPRC in  
27 accordance with the regulations and guidelines outlined in the Animal Welfare Act and the  
28 Guide for the Care and Use of Laboratory Animals and the recommendations of the  
29 Weatherall report ([https://royalsociety.org/topics-policy/publications/2006/weatherall-](https://royalsociety.org/topics-policy/publications/2006/weatherall-report/)  
30 [report/](https://royalsociety.org/topics-policy/publications/2006/weatherall-report/)). All macaques used in the study were free of *Macacine herpesvirus 1*, simian  
31 retrovirus type D (SRV), simian T-lymphotropic virus type 1 (STLV), and simian  
32 immunodeficiency virus (SIV). For all procedures (including physical examinations, virus  
33 inoculations, ultrasound examinations, and blood collection), animals were anaesthetized  
34 with an intramuscular dose of ketamine (10 mg/kg). Blood samples were obtained using a  
35 vacutainer system or needle and syringe from the femoral or saphenous vein.  
36  
37

38  
39  
40  
41  
42  
43  
44  
45  
46  
47  
48  
49  
50  
51  
52  
53  
54  
55  
56  
57  
58  
59  
60  
61  
62  
63  
64  
65  
66  
67  
68  
69  
70  
71  
72  
73  
74  
75  
76

## Cells and viruses

DENV-2/US/BID-V594/2006 was originally isolated from a human in Puerto Rico with one round of amplification on C6/36 cells. This DENV-2 isolate was obtained from BEI resources (NR-43280, Manassas, VA). Zika-virus/H.sapiens-tc/PUR/2015/PRVABC59\_v3c2 (ZIKV-PR) was originally isolated from a human in Puerto Rico in 2015, with three rounds of amplification on Vero cells, was obtained from Brandy Russell (CDC, Fort Collins, CO, USA). African Green Monkey kidney cells (Vero; ATCC #CCL-81) were maintained in Dulbecco's modified Eagle medium (DMEM) supplemented with 10% fetal bovine serum (FBS; Hyclone, Logan, UT), 2 mM L-glutamine, 1.5 g/L sodium bicarbonate, 100 U/ml penicillin, 100 µg/ml of streptomycin, and incubated at 37°C in 5% CO<sub>2</sub>. *Aedes albopictus* mosquito cells (C6/36; ATCC #CRL-1660) were maintained in DMEM supplemented with 10% fetal bovine serum (FBS; Hyclone, Logan, UT), 2mM L-glutamine, 1.5 g/L sodium bicarbonate, 100 U/ml penicillin, 100 µg/ml of streptomycin, and incubated at 28°C in 5% CO<sub>2</sub>. The cell lines were obtained from the American Type Culture Collection, were not further authenticated, and were not specifically tested for mycoplasma. Virus stocks were prepared by inoculation onto a confluent monolayer of C6/36 cells; a single, clarified stock was harvested for each virus, with a titer of 1.55 x 10<sup>5</sup> PFU/ml for DENV-2 and 1.58 x 10<sup>7</sup> PFU/ml for ZIKV-PR. Deep sequencing with limited PCR cycles confirmed that the DENV-2 virus stock was identical to the reported sequence in GenBank (EU482725) at the consensus level. Twelve nucleotide variants were detected at 5.3-16.1% frequency. Amplicon deep sequencing of ZIKV-PR virus stock using the methods described in Quick, et al. (57) revealed two consensus-level nucleotide substitutions in the stock as compared to the reported sequence in GenBank (KU501215), as well as seven other minor nucleotide variants detected at 5.3-30.6% frequency. Details on accessing sequence data can be found in the Data Accessibility section.

## Plaque Assay

All titrations for virus quantification from virus stocks and screens for infectious ZIKV from macaque tissue were completed by plaque assay on Vero cell cultures as previously described (58). Briefly, duplicate wells were infected with 0.1 ml aliquots from serial 10-fold dilutions in growth media and virus was adsorbed for one hour. Following incubation, the inoculum was removed, and monolayers were overlaid with 3ml containing a 1:1 mixture of 1.2% oxoid agar and 2X DMEM (Gibco, Carlsbad, CA) with 10% (vol/vol) FBS and 2% (vol/vol) penicillin/streptomycin (100 U/ml penicillin, 100 µg/ml of streptomycin). Cells were incubated at 37°C in 5% CO<sub>2</sub> for four days for plaque development. Cell monolayers were then stained with 3 ml of overlay containing a 1:1 mixture of 1.2% oxoid agar and 2X DMEM with 2% (vol/vol) FBS, 2% (vol/vol) penicillin/streptomycin, and 0.33% neutral red (Gibco). Cells were incubated overnight at 37 °C and plaques were counted.



77

## 78 **Inoculations**

79 Inocula were prepared from a viral stock propagated on a confluent monolayer of C6/36  
80 cells. The stocks were thawed, diluted in PBS to  $10^4$  PFU/ml and loaded into a 1 mL syringe  
81 that was kept on ice until challenge. Animals were anesthetized as described above and 1  
82 ml of inocula was delivered subcutaneously over the cranial dorsum. Animals were  
83 monitored closely following inoculation for any signs of an adverse reaction.

84

## 85 **Ultrasound measurements**

86 Ultrasound measurements were taken according to the procedures described previously  
87 (47). Briefly, dams were sedated with ketamine hydrochloride (10mg/kg) for weekly  
88 sonographic assessment to monitor the health of the fetus (heart rate) and to take fetal  
89 growth measurements, including the fetal femur length (FL), biparietal diameter (BPD), head  
90 circumference (HC), and abdominal circumference (AC). Weekly fetal measurements were  
91 plotted against mean measurement values and standard deviations for fetal macaques  
92 developed at the California National Primate Research Center (51, 52). Additional Doppler  
93 ultrasounds were taken as requested by veterinary staff.

94

95 Gestational age standardized growth parameters for fetal HC, BPD, AC, and FL were  
96 evaluated by calculating gestational age specific z-values from normative fetal growth  
97 parameters. Linear mixed effects modeling with animal-specific random effects was used to  
98 analyze the fetal growth trajectories with advancing gestational age. In order to account for  
99 differences in fetal growth parameters at the date of inoculation, changes in fetal growth  
00 parameters from date of inoculation (~day 50) were analyzed. That is, changes in fetal  
01 growth parameters from date of inoculation were regressed on gestational age (in weeks).  
02 An autoregressive correlation structure was used to account for correlations between  
03 repeated measurements of growth parameters over time. The growth trajectories were  
04 quantified by calculating the regression slope parameters which were reported along with  
05 the corresponding 95% confidence intervals (CI). Fetal growth was evaluated both within  
06 and between groups. All reported P-values are two-sided and  $P < 0.05$  was used to define  
07 statistical significance. Statistical analyses were conducted using SAS software (SAS  
08 Institute, Cary NC), version 9.4.

09

## 10 **Viral RNA isolation from blood**

11 Viral RNA was isolated from macaque blood samples as previously described (58, 59).  
12 Briefly, plasma was isolated from EDTA-anticoagulated whole blood on the day of collection  
13 either using Ficoll density centrifugation for 30 minutes at  $1860 \times g$  if the blood was being  
14 processed for PBMC, or it was centrifuged in the blood tube at  $1400 \times g$  for 15 minutes. The  
15 plasma layer was removed and transferred to a sterile 15 ml conical and spun at  $670 \times g$  for  
16 an additional 8 minutes to remove any remaining cells. Viral RNA was extracted from a 300  
17  $\mu$ L plasma aliquot using the Viral Total Nucleic Acid Kit (Promega, Madison, WI) on a  
18 Maxwell 16 MDx or Maxwell RSC 48 instrument (Promega, Madison, WI).

19

## 20 **Viral RNA isolation from tissues**

21 Tissue samples, cut to 0.5 cm thickness on at least one side, were stored in RNAlater at 4°C  
22 for 2-7 days. RNA was recovered from tissue samples using a modification of the method  
23 described by Hansen et al., 2013 (60). Briefly, up to 200 mg of tissue was disrupted in  
24 TRIzol (Lifetechnologies) with 2 x 5 mm stainless steel beads using the TissueLyser (Qiagen)  
25 for 3 minutes at 25 r/s twice. Following homogenization, samples in TRIzol were separated  
26 using Bromo-chloro-propane (Sigma). The aqueous phase was collected, and glycogen was  
27 added as a carrier. The samples were washed in isopropanol and ethanol precipitated. RNA  
28 was fully re-suspended in 5 mM tris pH 8.0.

29

## 30 **Quantitative reverse transcription PCR (QRT-PCR)**

31 vRNA isolated from both fluid and tissue samples was quantified by QRT-PCR as previously  
32 described (61). The RT-PCR was performed using either the SuperScript III Platinum One-  
33 Step Quantitative RT-PCR system (Invitrogen, Carlsbad, CA) or Taqman Fast Virus 1-step  
34 master mix (Applied Biosystems, Foster City, CA) on a LightCycler 96 or LightCycler 480  
35 instrument (Roche Diagnostics, Indianapolis, IN). Viral RNA concentration was determined  
36 by interpolation onto an internal standard curve composed of seven 10-fold serial dilutions  
37 of a synthetic ZIKV RNA fragment based on a ZIKV strain derived from French Polynesia  
38 that shares >99% similarity at the nucleotide level to the Puerto Rican strain used in the  
39 infections described in this manuscript.

40

## 41 **Statistical analysis of viral loads**

42 Plasma viral load curves were generated using GraphPad Prism software. The area under  
43 the curve of 0-10 d.p.i. was calculated using GraphPad software and a two-sample t-test  
44 was performed to assess differences in the peak, duration, and area under the curve of ZIKV  
45 viremia between DENV-immune and DENV-naïve macaques. Duration was calculated both  
46 as a raw number of days and as a binary, with >21 days of viremia considered “prolonged”  
47 and <21 days considered “non-prolonged.” To compare differences in the viral burden in  
48 the maternal-fetal interface, a non-parametric Mann-Whitney U test was used to assess  
49 differences in each of the maternal-fetal interface tissues. GraphPad Prism 8 software was  
50 used for these analyses.

51

## 52 **Plaque reduction neutralization test (PRNT)**

53 Macaque serum was isolated from whole blood on the same day it was collected using a  
54 serum separator tube (SST) or clot activator (CA) tube. The SST or CA tube was centrifuged  
55 for at least 20 minutes at 1400 x g, the serum layer was removed and placed in a 15 ml  
56 conical and centrifuged for 8 minutes at 670 x g to remove any additional cells. Serum was  
57 screened for ZIKV neutralizing antibody utilizing a plaque reduction neutralization test  
58 (PRNT) on Vero cells as described in (62) against DENV-2 and ZIKV-PR. Neutralization  
59 curves were generated using GraphPad Prism 8 software. The resulting data were analyzed

60 by non-linear regression to estimate the dilution of serum required to inhibit 50% and 90%  
61 of infection.

62  
63 **Inhibition ELISA (iELISA assay)** The DENV iELISA was performed on serum samples as  
64 previously described (2, 63, 64). Briefly, ELISA plates were coated with anti-DENV  
65 polyclonal IgG to capture a mixture of DENV 1-4 antigen (DENV prototype strains, GenBank  
66 Accession #s: KM204119, KM204118, KU050695, KR011349) diluted in Phosphate Buffer  
67 Saline + 0.05% Tween 20 at pH 7.4 (PBS-T)(65). After blocking and additional washes,  
68 macaque serum was added in 10-fold serial dilutions (1:10, 1:100, 1:1000, 1:10,000) and  
69 incubated for two hours at 37°C. Thereafter, a set concentration of horseradish peroxidase  
70 (HRP)-conjugated polyclonal anti-DENV IgG to each well and incubated for 30 minutes at  
71 37°C. Following washes, peroxidase substrate TMB was added to wells and incubated for  
72 30 minutes at room temperature, then stopped with sulfuric acid. Plates were read on an  
73 ELISA reader, and iELISA titers were estimated relative to negative controls (conjugated  
74 antibody only) using the Reed-Muench method (66). The ZIKV iELISA is similar in design to  
75 the DENV iELISA and was performed as described previously (67). ZIKV-specific  
76 monoclonal antibody ZKA64 (68) is used to capture ZIKV antigen prepared as described by  
77 (65), macaque serum was added in serial dilutions and competed with HRP-conjugated  
78 mAb ZKA64, and iELISA titers were also estimated using the Reed-Muench method.

### 69 80 **Cesarean section and tissue collection**

81 Between 159-161 days gestation, infants were delivered via cesarean section and tissues  
82 were collected. The fetus, placenta, fetal membranes, umbilical cord, and amniotic fluid  
83 were collected at surgical uterotomy and maternal tissues were biopsied during laparotomy.  
84 These were survival surgeries for the dams and offspring. Amniotic fluid was removed from  
85 the amniotic sac, then infant was removed from the amniotic sac, the umbilical cord  
86 clamped, and neonatal resuscitation performed as needed. The placenta and fetal  
87 membranes were then collected. Infants were placed with their mothers following the dam's  
88 recovery from surgery.

89  
90 Tissues were dissected as previously described (47) using sterile instruments that were  
91 changed between each organ and tissue type to minimize possible cross contamination.  
92 Each organ/tissue was evaluated grossly, dissected with sterile instruments in a sterile  
93 culture dish, and sampled for histology, viral burden assay, and/or banked for future assays.  
94 A comprehensive listing of all specific tissues collected and analyzed is presented in Fig. 6A  
95 (maternal-fetal interface tissues) and Supplementary Table 2 (maternal biopsies and fetal  
96 fluids). Biopsies of the placental bed (uterine placental attachment site containing deep  
97 decidua basalis and myometrium), maternal liver, spleen, and a mesenteric lymph node  
98 were collected aseptically during surgery into sterile petri dishes, weighed, and further  
99 processed for viral burden and when sufficient sample size was obtained, histology.

01 In order to more accurately capture the distribution of ZIKV in the placenta, each placental  
02 disc was separated, fetal membranes sharply dissected from the margin, weighed,  
03 measured, and placed in a sterile dish on ice. A 1-cm-wide cross section was taken from  
04 the center of each disc, including the umbilical cord insertion on the primary disc, and  
05 placed in 4% paraformaldehyde. Individual cotyledons, or perfusion domains, were  
06 dissected using a scalpel and placed into individual petri dishes. From each cotyledon, a  
07 thin center cut was taken using a razor blade and placed into a cassette in 4%  
08 paraformaldehyde. Once the center cut was collected, the decidua and the chorionic plate  
09 were removed from the remaining placenta. From each cotyledon, pieces of decidua,  
10 chorionic plate, and chorionic villi were collected into two different tubes – one with  
11 RNAlater for vRNA isolation and one with 20% FBS/PBS for other virological assays.

## 12 13 **Histology**

14 Following collection, tissues were handled as described previously (58). All tissues were  
15 fixed in 4% paraformaldehyde for 24 hours and transferred into 70% ethanol until  
16 processed and embedded in paraffin. Paraffin sections (5  $\mu$ m) were stained with  
17 hematoxylin and eosin (H&E). Pathologists were blinded to vRNA findings when tissue  
18 sections were evaluated microscopically. Photomicrographs were obtained using a bright  
19 light microscope Olympus BX43 and Olympus BX46 (Olympus Inc., Center Valley, PA) with  
20 attached Olympus DP72 digital camera (Olympus Inc.) and Spot Flex 152 64 Mp camera  
21 (Spot Imaging) and captured using commercially available image-analysis software (cellSens  
22 DimensionR, Olympus Inc. and spot software 5.2).

## 23 24 **Placental Histology Scoring**

25 Pathological evaluation of the cross-sections of each of the individual placental cotyledons  
26 were performed by Dr. Terry Morgan who was blinded to experimental condition. Each of  
27 the cross sections were evaluated for the presence of chronic histiocytic intervillitis  
28 (CHIV), infarctions, villous stromal calcifications, and vasculopathy. A three-way ANOVA was  
29 performed to assess statistical significance among groups for each parameter, including  
30 placental weight.

31  
32 Two of three boarded veterinary pathologists, blinded to vRNA findings, independently  
33 reviewed the central cross section of each placental disc and quantitatively scored the  
34 placentas on 22 independent criteria. Six of the criteria are general criteria assessing  
35 placental function, two assess villitis, three criteria assess the presence of fetal vascular  
36 malperfusion, and 11 criteria assess the presence of maternal vascular malperfusion. The  
37 scoring system was developed by Dr. Michael Fritsch, Dr. Heather Simmons, and Dr.  
38 Andres Mejia. A summary table of the criteria scored, and the scale used for each criterion  
39 can be found in Supplementary Table 3. Once initial scores were assigned, all pathologists  
40 met to discuss and resolve any significant discrepancies in scoring. Scores were assigned  
41 to each placental disc unless the criteria scored corresponded to the function of the entire  
42 placenta.

43

44 For criteria measured on a quantitative scale, median scores and interquartile range were  
45 calculated for each experimental group. For criteria measured on a binary “present/not  
46 present” scale, the cumulative incidence in each experimental group was calculated as a  
47 frequency and a percentage. For quantitative criteria, a non-parametric Wilcoxon rank test  
48 was used to calculate statistical significance between each of the groups and between the  
49 mock-infected group and the two ZIKV-infected groups. For binary features, Fisher’s exact  
50 test was used to calculate statistical significance between each of the groups and between  
51 the mock-infected group and the two ZIKV-infected groups. To determine whether chronic  
52 villitis correlated with the criteria assessing fetal malperfusion and whether chronic  
53 deciduitis correlated with the criteria assessing maternal malperfusion, scores were adjusted  
54 to be on the same scale (i.e., converting measures on a 0-1 scale to a 0-2 scale) so that  
55 each parameter carried equal weight in the combined score. A nonparametric Spearman's  
56 correlation was used to determine the correlation.

57

## 58 REFERENCES

- 59 1. Ngono, A. E., and S. Shresta. 2018. Immune Response to Dengue and Zika. *Annu Rev*  
60 *Immunol* 36: 279-308.
- 61 2. Katzelnick, L. C., L. Gresh, M. E. Halloran, J. C. Mercado, G. Kuan, A. Gordon, A.  
62 Balmaseda, and E. Harris. 2017. Antibody-dependent enhancement of severe dengue  
63 disease in humans. *Science* 358: 929-932.
- 64 3. Halstead, S. B., and E. J. O’Rourke. 1977. Dengue viruses and mononuclear  
65 phagocytes. I. Infection enhancement by non-neutralizing antibody. *J Exp Med* 146: 201-  
66 217.
- 67 4. Whitehead, S. S., J. E. Blaney, A. P. Durbin, and B. R. Murphy. 2007. Prospects for a  
68 dengue virus vaccine. *Nat Rev Microbiol* 5: 518-528.
- 69 5. Halstead, S. B. 2014. Dengue Antibody-Dependent Enhancement: Knowns and  
70 Unknowns. In *Antibodies for Infectious Diseases*, ed. American Society of Microbiology,  
71 p. 249-271.
- 72 6. Kam, Y. W., C. Y. Lee, T. H. Teo, S. W. Howland, S. N. Amrun, F. M. Lum, P. See, N. Q.  
73 Kng, R. G. Huber, M. H. Xu, H. L. Tan, A. Choo, S. Maurer-Stroh, F. Ginhoux, K. Fink, C.  
74 I. Wang, L. F. Ng, and L. Rénia. 2017. Cross-reactive dengue human monoclonal  
75 antibody prevents severe pathologies and death from Zika virus infections. *JCI Insight* 2:  
76 7. Bardina, S. V., P. Bunduc, S. Tripathi, J. Duehr, J. J. Frere, J. A. Brown, R. Nachbagauer,  
77 G. A. Foster, D. Krysztof, D. Tortorella, S. L. Stramer, A. García-Sastre, F. Krammer, and  
78 J. K. Lim. 2017. Enhancement of Zika virus pathogenesis by preexisting ant flavivirus  
79 immunity. *Science* 356: 175-180.
- 80 8. Castanha, P. M. S., E. J. M. Nascimento, B. Cynthia, M. T. Cordeiro, O. V. de Carvalho,  
81 L. R. de Mendonça, E. A. N. Azevedo, R. F. O. França, D. Rafael, and E. T. A. Marques.  
82 2017. Dengue virus (DENV)-specific antibodies enhance Brazilian Zika virus (ZIKV)  
83 infection. *Journal of Infectious Diseases* jiw638.

- 84 9. Londono-Renteria, B., A. Troupin, J. C. Cardenas, A. Hall, O. G. Perez, L. Cardenas, A.  
85 Hartstone-Rose, S. B. Halstead, and T. M. Colpitts. 2017. A relevant in vitro human  
86 model for the study of Zika virus antibody-dependent enhancement. *Journal of General*  
87 *Virology* 98: 1702-1712.
- 88 10. Priyamvada, L., K. M. Quicke, W. H. Hudson, N. Onlamoon, J. Sewatanon, S.  
89 Edupuganti, K. Pattanapanyasat, K. Chokephaibulkit, M. J. Mulligan, P. C. Wilson, R.  
90 Ahmed, M. S. Suthar, and J. Wrammert. 2016. Human antibody responses after dengue  
91 virus infection are highly cross-reactive to Zika virus. *Proc Natl Acad Sci U S A* 113:  
92 7852-7857.
- 93 11. Li, M., L. Zhao, C. Zhang, X. Wang, W. Hong, J. Sun, R. Liu, L. Yu, J. Wang, F. Zhang,  
94 and X. Jin. 2018. Dengue immune sera enhance Zika virus infection in human peripheral  
95 blood monocytes through Fc gamma receptors. *PLoS One* 13: e0200478.
- 96 12. Dejnirattisai, W., P. Supasa, W. Wongwiwat, A. Rouvinski, G. Barba-Spaeth, T.  
97 Duangchinda, A. Sakuntabhai, V.-M. Cao-Lormeau, P. Malasit, F. A. Rey, J.  
98 Mongkolsapaya, and G. R. Screaton. 2016. Dengue virus sero-cross-reactivity drives  
99 antibody-dependent enhancement of infection with zika virus. *Nature Immunology* 17:  
00 1102-1108.
- 01 13. Swanstrom, J. A., J. A. Plante, K. S. Plante, E. F. Young, E. McGowan, E. N. Gallichotte,  
02 D. G. Widman, M. T. Heise, A. M. de Silva, and R. S. Baric. 2016. Dengue Virus Envelope  
03 Dimer Epitope Monoclonal Antibodies Isolated from Dengue Patients Are Protective  
04 against Zika Virus. *mBio* 7:
- 05 14. Collins, M. H., E. McGowan, R. Jadi, E. Young, C. A. Lopez, R. S. Baric, H. M. Lazear,  
06 and A. M. de Silva. 2017. Lack of Durable Cross-Neutralizing Antibodies Against Zika  
07 Virus from Dengue Virus Infection. *Emerg Infect Dis* 23: 773-781.
- 08 15. Montoya, M., M. Collins, W. Dejnirattisai, L. C. Katzelnick, H. Puerta-Guardo, R. Jadi, S.  
09 Schildhauer, P. Supasa, S. Vasanawathana, P. Malasit, J. Mongkolsapaya, A. D. de  
10 Silva, H. Tissera, A. Balmaseda, G. Screaton, A. M. de Silva, and E. Harris. 2018.  
11 Longitudinal Analysis of Antibody Cross-neutralization Following Zika Virus and Dengue  
12 Virus Infection in Asia and the Americas. *J Infect Dis* 218: 536-545.
- 13 16. Zhang, S., T. Loy, T. S. Ng, X. N. Lim, S. V. Chew, T. Y. Tan, M. Xu, V. A. Kostyuchenko,  
14 F. Tukijan, J. Shi, K. Fink, and S. M. Lok. 2020. A Human Antibody Neutralizes Different  
15 Flaviviruses by Using Different Mechanisms. *Cell Rep* 31: 107584.
- 16 17. Regla-Nava, J. A., A. Elong Ngonu, K. M. Viramontes, A. T. Huynh, Y. T. Wang, A. T.  
17 Nguyen, R. Salgado, A. Mamidi, K. Kim, M. S. Diamond, and S. Shresta. 2018. Cross-  
18 reactive Dengue virus-specific CD8<sup>+</sup> T cells protect against Zika virus during pregnancy.  
19 *Nat Commun* 9: 3042.
- 20 18. Wen, J., A. Elong Ngonu, J. A. Regla-Nava, K. Kim, M. J. Gorman, M. S. Diamond, and  
21 S. Shresta. 2017. Dengue virus-reactive CD8<sup>+</sup> T cells mediate cross-protection against  
22 subsequent Zika virus challenge. *Nat Commun* 8: 1459.
- 23 19. Wen, J., Y. T. Wang, K. M. Valentine, R. P. Dos Santos Alves, Z. Xu, J. A. Regla-Nava, A.  
24 E. Ngonu, M. P. Young, L. C. S. Ferreira, and S. Shresta. 2020. CD4<sup>+</sup> T Cells Cross-

- 25 Reactive with Dengue and Zika Viruses Protect against Zika Virus Infection. *Cell Rep* 31:  
26 107566.
- 27 20. Katzelnick, L. C., S. Bos, and E. Harris. 2020. Protective and enhancing interactions  
28 among dengue viruses 1-4 and Zika virus. *Curr Opin Virol* 43: 59-70.
- 29 21. Rodriguez-Barraquer, I., F. Costa, E. J. M. Nascimento, N. Nery, P. M. S. Castanha, G.  
30 A. Sacramento, J. Cruz, M. Carvalho, D. De Olivera, J. E. Hagan, H. Adhikarla, E. A.  
31 Wunder, D. F. Coêlho, S. R. Azar, S. L. Rossi, N. Vasilakis, S. C. Weaver, G. S. Ribeiro,  
32 A. Balmaseda, E. Harris, M. L. Nogueira, M. G. Reis, E. T. A. Marques, D. A. T.  
33 Cummings, and A. I. Ko. 2019. Impact of preexisting dengue immunity on Zika virus  
34 emergence in a dengue endemic region. *Science* 363: 607-610.
- 35 22. Santiago, G. A., T. M. Sharp, E. Rosenberg, I. I. Sosa Cardona, L. Alvarado, G. Paz-  
36 Bailey, and J. L. Muñoz-Jordán. 2019. Prior Dengue Virus Infection Is Associated With  
37 Increased Viral Load in Patients Infected With Dengue but Not Zika Virus. *Open Forum*  
38 *Infect Dis* 6:
- 39 23. Gordon, A., L. Gresh, S. Ojeda, L. C. Katzelnick, N. Sanchez, J. C. Mercado, G. Chowell,  
40 B. Lopez, D. Elizondo, J. Coloma, R. Burger-Calderon, G. Kuan, A. Balmaseda, and E.  
41 Harris. 2019. Prior dengue virus infection and risk of Zika: A pediatric cohort in  
42 Nicaragua. *PLoS Med* 16: e1002726.
- 43 24. Michlmayr, D., E. Y. Kim, A. H. Rahman, R. Raghunathan, S. Kim-Schulze, Y. Che, S.  
44 Kalayci, Z. H. Gümüş, G. Kuan, A. Balmaseda, A. Kasarskis, S. M. Wolinsky, M. Suárez-  
45 Fariñas, and E. Harris. 2020. Comprehensive Immunoprofiling of Pediatric Zika Reveals  
46 Key Role for Monocytes in the Acute Phase and No Effect of Prior Dengue Virus  
47 Infection. *Cell Rep* 31: 107569.
- 48 25. Tonnerre, P., J. G. Melgaço, A. Torres-Cornejo, M. A. Pinto, C. Yue, J. Blümel, P. S. F.  
49 de Sousa, V. D. M. de Mello, J. Moran, A. M. B. de Filippis, D. Wolski, A. Grifoni, A.  
50 Sette, D. H. Barouch, R. C. Hoogeveen, S. A. Baylis, G. M. Lauer, and L. L. Lewis-  
51 Ximenez. 2020. Evolution of the innate and adaptive immune response in women with  
52 acute Zika virus infection. *Nat Microbiol* 5: 76-83.
- 53 26. McCracken, M. K., G. D. Gromowski, H. L. Friberg, X. Lin, P. Abbink, R. De La Barrera,  
54 K. H. Eckles, L. S. Garver, M. Boyd, D. Jetton, D. H. Barouch, M. C. Wise, B. S. Lewis, J.  
55 R. Currier, K. Modjarrad, M. Milazzo, M. Liu, A. B. Mullins, J. R. Putnak, N. L. Michael, R.  
56 G. Jarman, and S. J. Thomas. 2017. Impact of prior flavivirus immunity on Zika virus  
57 infection in rhesus macaques. *PLoS Pathog* 13: e1006487.
- 58 27. Pantoja, P., E. X. Pérez-Guzmán, I. V. Rodríguez, L. J. White, O. González, C. Serrano, L.  
59 Giavedoni, V. Hodara, L. Cruz, T. Arana, M. I. Martínez, M. A. Hassert, J. D. Brien, A. K.  
60 Pinto, A. de Silva, and C. A. Sariol. 2017. Zika virus pathogenesis in rhesus macaques is  
61 unaffected by pre-existing immunity to dengue virus. *Nat Commun* 8: 15674.
- 62 28. Breitbach, M. E., C. M. Newman, D. M. Dudley, L. M. Stewart, M. T. Aliota, M. R. Koenig,  
63 P. M. Shepherd, K. Yamamoto, C. M. Crooks, G. Young, M. R. Semler, A. M. Weiler, G.  
64 L. Barry, H. Heimsath, E. L. Mohr, J. Eichkoff, W. Newton, E. Peterson, N. Schultz-  
65 Darken, S. R. Permar, H. Dean, S. Capuano, J. E. Osorio, T. C. Friedrich, and D. H.

- 66 O'Connor. 2019. Primary infection with dengue or Zika virus does not affect the severity  
67 of heterologous secondary infection in macaques. *PLoS Pathog* 15: e1007766.
- 68 29. Abbink, P., R. A. Larocca, W. Dejnirattisai, R. Peterson, J. P. Nkolola, E. N. Borducchi, P.  
69 Supasa, J. Mongkolsapaya, G. R. Screaton, and D. H. Barouch. 2018. Therapeutic and  
70 protective efficacy of a dengue antibody against Zika infection in rhesus monkeys. *Nat*  
71 *Med*
- 72 30. Cao-Lormeau, V. M., C. Roche, M. Aubry, A. Teissier, S. Lastere, E. Daudens, H. P.  
73 Mallet, D. Musso, and J. Aaskov. 2011. Recent emergence of dengue virus serotype 4 in  
74 French Polynesia results from multiple introductions from other South Pacific Islands.  
75 *PLoS One* 6: e29555.
- 76 31. Savage, H. M., C. L. Fritz, D. Rutstein, A. Yolwa, V. Vorndam, and D. J. Gubler. 1998.  
77 Epidemic of dengue-4 virus in Yap State, Federated States of Micronesia, and  
78 implication of *Aedes hensilli* as an epidemic vector. *Am J Trop Med Hyg* 58: 519-524.
- 79 32. Durand, M. A., M. Bel, I. Ruwey, M. Marfel, L. Yug, and V. Ngaden. 2005. An outbreak of  
80 dengue fever in Yap State. *Pac Health Dialog* 12: 99-102.
- 81 33. Dupont-Rouzeyrol, M., O. O'Connor, E. Calvez, M. Daurès, M. John, J. P. Grangeon, and  
82 A. C. Gourinat. 2015. Co-infection with Zika and dengue viruses in 2 patients, New  
83 Caledonia, 2014. *Emerg Infect Dis* 21: 381-382.
- 84 34. Zimmerman, M. G., K. M. Quicke, J. T. O'Neal, N. Arora, D. Machiah, L. Priyamvada, R.  
85 C. Kauffman, E. Register, O. Adekunle, D. Swieboda, E. L. Johnson, S. Cordes, L.  
86 Haddad, R. Chakraborty, C. B. Coyne, J. Wrammert, and M. S. Suthar. 2018. Cross-  
87 Reactive Dengue Virus Antibodies Augment Zika Virus Infection of Human Placental  
88 Macrophages. *Cell Host Microbe* 24: 731-742.e6.
- 89 35. Hermanns, K., C. Göhner, A. Kopp, A. Schmidt, W. M. Merz, U. R. Markert, S. Junglen,  
90 and C. Drosten. 2018. Zika virus infection in human placental tissue explants is  
91 enhanced in the presence of dengue virus antibodies in-vitro. *Emerg Microbes Infect* 7:  
92 198.
- 93 36. Brown, J. A., G. Singh, J. A. Acklin, S. Lee, J. E. Duehr, A. N. Chokola, J. J. Frere, K. W.  
94 Hoffman, G. A. Foster, D. Kryzstof, R. Cadagan, A. R. Jacobs, S. L. Stramer, F.  
95 Krammer, A. García-Sastre, and J. K. Lim. 2019. Dengue Virus Immunity Increases Zika  
96 Virus-Induced Damage during Pregnancy. *Immunity* 50: 1-12.
- 97 37. Rathore, A. P. S., W. A. A. Saron, T. Lim, N. Jahan, and A. L. St John. 2019. Maternal  
98 immunity and antibodies to dengue virus promote infection and Zika virus-induced  
99 microcephaly in fetuses. *Sci Adv* 5: eaav3208.
- 00 38. Halai, U. A., K. Nielsen-Saines, M. L. Moreira, P. C. de Sequeira, J. P. P. Junior, A. de  
01 Araujo Zin, J. Cherry, C. R. Gabaglia, S. L. Gaw, K. Adachi, I. Tsui, J. H. Pilotto, R. R.  
02 Nogueira, A. M. B. de Filippis, and P. Brasil. 2017. Maternal Zika Virus Disease Severity,  
03 Virus Load, Prior Dengue Antibodies, and Their Relationship to Birth Outcomes. *Clin*  
04 *Infect Dis* 65: 877-883.
- 05 39. Moreira-Soto, A., M. Sarno, C. Pedroso, E. M. Netto, A. Rockstroh, E. Luz, M. Feldmann,  
06 C. Fischer, F. A. Bastos, B. M. Kümmerer, X. de Lamballerie, C. Drosten, S. Ulbert, C.  
07 Brites, and J. F. Drexler. 2017. Evidence for Congenital Zika Virus Infection From



08 Neutralizing Antibody Titers in Maternal Sera, Northeastern Brazil. *J Infect Dis* 216: 1501-  
09 1504.

- 10 40. Castanha, P. M. S., W. V. Souza, C. Braga, T. V. B. Araújo, R. A. A. Ximenes, M. F. P. M.  
11 Albuquerque, U. R. Montarroyos, D. B. Miranda-Filho, M. T. Cordeiro, R. Dhalia, E. T. A.  
12 Marques, L. C. Rodrigues, C. M. T. Martelli, and E. R. G. Microcephaly. 2019. Perinatal  
13 analyses of Zika- and dengue virus-specific neutralizing antibodies: A microcephaly  
14 case-control study in an area of high dengue endemicity in Brazil. *PLoS Negl Trop Dis*  
15 13: e0007246.
- 16 41. Carvalho, M. S., L. P. Freitas, O. G. Cruz, P. Brasil, and L. S. Bastos. 2020. Association  
17 of past dengue fever epidemics with the risk of Zika microcephaly at the population level  
18 in Brazil. *Sci Rep* 10: 1752.
- 19 42. Diamond, M. S., J. E. Ledgerwood, and T. C. Pierson. 2019. Zika Virus Vaccine  
20 Development: Progress in the Face of New Challenges. *Annu Rev Med* 70: 121-135.
- 21 43. Barba-Spaeth, G., W. Dejnirattisai, A. Rouvinski, M. C. Vaney, I. Medits, A. Sharma, E.  
22 Simon-Lorière, A. Sakuntabhai, V. M. Cao-Lormeau, A. Haouz, P. England, K. Stiasny, J.  
23 Mongkolsapaya, F. X. Heinz, G. R. Screaton, and F. A. Rey. 2016. Structural basis of  
24 potent Zika-dengue virus antibody cross-neutralization. *Nature* 536: 48-53.
- 25 44. Rey, F. A., K. Stiasny, M. C. Vaney, M. Dellarole, and F. X. Heinz. 2018. The bright and  
26 the dark side of human antibody responses to flaviviruses: lessons for vaccine design.  
27 *EMBO Rep* 19: 206-224.
- 28 45. Halstead, S. B. 2017. Dengvaxia sensitizes seronegatives to vaccine enhanced disease  
29 regardless of age. *Vaccine* 35: 6355-6358.
- 30 46. Newman, C., T. C. Friedrich, and D. H. O'Connor. 2017. Macaque monkeys in Zika virus  
31 research: 1947-present. *Curr Opin Virol* 25: 34-40.
- 32 47. Nguyen, S. M., K. M. Antony, D. M. Dudley, S. Kohn, H. A. Simmons, B. Wolfe, M. S.  
33 Salamat, L. B. C. Teixeira, G. J. Wiepz, T. H. Thoong, M. T. Aliota, A. M. Weiler, G. L.  
34 Barry, K. L. Weisgrau, L. J. Vosler, M. S. Mohns, M. E. Breitbach, L. M. Stewart, M. N.  
35 Rasheed, C. M. Newman, M. E. Graham, O. E. Wieben, P. A. Turski, K. M. Johnson, J.  
36 Post, J. M. Hayes, N. Schultz-Darken, M. L. Schotzko, J. A. Eudailey, S. R. Permar, E. G.  
37 Rakasz, E. L. Mohr, S. Capuano, A. F. Tarantal, J. E. Osorio, S. L. O'Connor, T. C.  
38 Friedrich, D. H. O'Connor, and T. G. Golos. 2017. Highly efficient maternal-fetal Zika  
39 virus transmission in pregnant rhesus macaques. *PLoS Pathog* 13: e1006378.
- 40 48. Salje, H., D. A. T. Cummings, I. Rodriguez-Barraquer, L. C. Katzelnick, J. Lessler, C.  
41 Klungthong, B. Thaisomboonsuk, A. Nisalak, A. Weg, D. Ellison, L. Macareo, I. K. Yoon,  
42 R. Jarman, S. Thomas, A. L. Rothman, T. Endy, and S. Cauchemez. 2018.  
43 Reconstruction of antibody dynamics and infection histories to evaluate dengue risk.  
44 *Nature* 557: 719-723.
- 45 49. Katzelnick, L. C., C. Narvaez, S. Arguello, B. Lopez Mercado, D. Collado, O. Ampie, D.  
46 Elizondo, T. Miranda, F. Bustos Carillo, J. C. Mercado, K. Latta, A. Schiller, B. Segovia-  
47 Chumbez, S. Ojeda, N. Sanchez, M. Plazaola, J. Coloma, M. E. Halloran, L. Premkumar,  
48 A. Gordon, F. Narvaez, A. M. de Silva, G. Kuan, A. Balmaseda, and E. Harris. 2020. Zika  
49 virus infection enhances future risk of severe dengue disease. *Science* 369: 1123-1128.

- 50 50. Abbink, P., R. A. Larocca, K. Visitsunthorn, M. Boyd, A. Rafael, G. D. Gromowski, M.  
51 Kirilova, R. Peterson, Z. Li, and O. Nanayakkara. 2017. Durability and correlates of  
52 vaccine protection against Zika virus in rhesus monkeys. *Science translational medicine*  
53 9:
- 54 51. Tarantal, A. F., and A. G. Hendrickx. 1988. Prenatal growth in the cynomolgus and  
55 rhesus macaque (*Macaca fascicularis* and *Macaca mulatta*): A comparison by  
56 ultrasonography. *Am J Primatol* 15: 309-323.
- 57 52. Tarantal, A. F. 2005. Ultrasound Imaging in Rhesus (*Macaca Mulatta*) and Long-Tailed  
58 (*Macaca fascicularis*) Macaques. Reproductive and Research Applications. The  
59 Laboratory Primate: 317-352.
- 60 53. Gynecologists, A. C. O. O. A. 2019. ACOG Practice Bulletin No. 204: fetal growth  
61 restriction. *Obstetrics and gynecology* 133: e97-e109.
- 62 54. Arora, N., Y. Sadovsky, T. S. Dermody, and C. B. Coyne. 2017. Microbial Vertical  
63 Transmission during Human Pregnancy. *Cell Host Microbe* 21: 561-567.
- 64 55. Nielsen-Saines, K., P. Brasil, T. Kerin, Z. Vasconcelos, C. R. Gabaglia, L. Damasceno, M.  
65 Pone, L. M. Abreu de Carvalho, S. M. Pone, A. A. Zin, I. Tsui, T. R. S. Salles, D. C. da  
66 Cunha, R. P. Costa, J. Malacarne, A. B. Reis, R. H. Hasue, C. Y. P. Aizawa, F. F.  
67 Genovesi, C. Einspieler, P. B. Marschik, J. P. Pereira, S. L. Gaw, K. Adachi, J. D. Cherry,  
68 Z. Xu, G. Cheng, and M. E. Moreira. 2019. Delayed childhood neurodevelopment and  
69 neurosensory alterations in the second year of life in a prospective cohort of ZIKV-  
70 exposed children. *Nat Med* 25: 1213-1217.
- 71 56. Crooks, C. M., A. M. Weiler, S. L. Rybarczyk, M. I. Bliss, A. S. Jaeger, M. E. Murphy, H.  
72 A. Simmons, A. Mejia, M. K. Fritsch, J. M. Hayes, J. C. Eickhoff, A. M. Mitzey, E. Razo,  
73 K. Braun, E. A. Brown, K. Yamamoto, P. M. Shepard, A. Possell, K. Weaver, K. M.  
74 Antony, T. K. Morgan, D. Dudley, E. Peterson, N. Schultz-Darken, D. H. O'Connor, E. L.  
75 Mohr, T. G. Golos, M. Aliota, and T. C. Friedrich. 2020. African-lineage Zika virus  
76 replication dynamics and maternal-fetal interface infection in pregnant rhesus macaques.  
77 *bioRxiv*
- 78 57. Quick, J., N. D. Grubaugh, S. T. Pullan, I. M. Claro, A. D. Smith, K. Gangavarapu, G.  
79 Oliveira, R. Robles-Sikisaka, T. F. Rogers, N. A. Beutler, D. R. Burton, L. L. Lewis-  
80 Ximenez, J. G. de Jesus, M. Giovanetti, S. C. Hill, A. Black, T. Bedford, M. W. Carroll, M.  
81 Nunes, L. C. Alcantara, E. C. Sabino, S. A. Baylis, N. R. Faria, M. Loose, J. T. Simpson,  
82 O. G. Pybus, K. G. Andersen, and N. J. Loman. 2017. Multiplex PCR method for MinION  
83 and Illumina sequencing of Zika and other virus genomes directly from clinical samples.  
84 *Nat Protoc* 12: 1261-1276.
- 85 58. Aliota, M. T., D. M. Dudley, C. M. Newman, J. Weger-Lucarelli, L. M. Stewart, M. R.  
86 Koenig, M. E. Breitbach, A. M. Weiler, M. R. Semler, G. L. Barry, K. R. Zarbock, A. K. Haj,  
87 R. V. Moriarty, M. S. Mohns, E. L. Mohr, V. Venturi, N. Schultz-Darken, E. Peterson, W.  
88 Newton, M. L. Schotzko, H. A. Simmons, A. Mejia, J. M. Hayes, S. Capuano, M. P.  
89 Davenport, T. C. Friedrich, G. D. Ebel, S. L. O'Connor, and D. H. O'Connor. 2018.  
90 Molecularly barcoded Zika virus libraries to probe in vivo evolutionary dynamics. *PLoS*  
91 *Pathog* 14: e1006964.

- 92 59. Dudley, D. M., M. T. Aliota, E. L. Mohr, A. M. Weiler, G. Lehrer-Brey, K. L. Weisgrau, M.  
93 S. Mohns, M. E. Breitbach, M. N. Rasheed, C. M. Newman, D. D. Gellerup, L. H. Moncla,  
94 J. Post, N. Schultz-Darken, M. L. Schotzko, J. M. Hayes, J. A. Eudailey, M. A. Moody, S.  
95 R. Permar, S. L. O'Connor, E. G. Rakasz, H. A. Simmons, S. Capuano, T. G. Golos, J. E.  
96 Osorio, T. C. Friedrich, and D. H. O'Connor. 2016. A rhesus macaque model of Asian-  
97 lineage Zika virus infection. *Nat Commun* 7: 12204.
- 98 60. Hansen, S. G., M. Piatak, A. B. Ventura, C. M. Hughes, R. M. Gilbride, J. C. Ford, K.  
99 Oswald, R. Shoemaker, Y. Li, M. S. Lewis, A. N. Gilliam, G. Xu, N. Whizin, B. J. Burwitz,  
00 S. L. Planer, J. M. Turner, A. W. Legasse, M. K. Axthelm, J. A. Nelson, K. Früh, J. B.  
01 Sacha, J. D. Estes, B. F. Keele, P. T. Edlefsen, J. D. Lifson, and L. J. Picker. 2013.  
02 Immune clearance of highly pathogenic SIV infection. *Nature* 502: 100-104.
- 03 61. Jaeger, A. S., R. A. Murrieta, L. R. Goren, C. M. Crooks, R. V. Moriarty, A. M. Weiler, S.  
04 Rybarczyk, M. R. Semler, C. Huffman, A. Mejia, H. A. Simmons, M. Fritsch, J. E. Osorio,  
05 J. C. Eickhoff, S. L. O'Connor, G. D. Ebel, T. C. Friedrich, and M. T. Aliota. 2019. Zika  
06 viruses of African and Asian lineages cause fetal harm in a mouse model of vertical  
07 transmission. *PLoS Negl Trop Dis* 13: e0007343.
- 08 62. Lindsey, H. S., C. H. Calisher, and J. H. Mathews. 1976. Serum dilution neutralization  
09 test for California group virus identification and serology. *J Clin Microbiol* 4: 503-510.
- 10 63. Balmaseda, A., S. N. Hammond, Y. Tellez, L. Imhoff, Y. Rodriguez, S. I. Saborío, J. C.  
11 Mercado, L. Perez, E. Videa, E. Almanza, G. Kuan, M. Reyes, L. Saenz, J. J. Amador,  
12 and E. Harris. 2006. High seroprevalence of antibodies against dengue virus in a  
13 prospective study of schoolchildren in Managua, Nicaragua. *Trop Med Int Health* 11:  
14 935-942.
- 15 64. Fernández, R. J., and S. Vázquez. 1990. Serological diagnosis of dengue by an ELISA  
16 inhibition method (EIM). *Mem Inst Oswaldo Cruz* 85: 347-351.
- 17 65. CLARKE, D. H., and J. CASALS. 1958. Techniques for hemagglutination and  
18 hemagglutination-inhibition with arthropod-borne viruses. *Am J Trop Med Hyg* 7: 561-  
19 573.
- 20 66. Reed, L. J., and H. Muench. 1938. A simple method of estimating fifty per cent  
21 endpoints. *American journal of epidemiology* 27: 493-497.
- 22 67. Balmaseda, A., J. V. Zambrana, D. Collado, N. García, S. Saborío, D. Elizondo, J. C.  
23 Mercado, K. Gonzalez, C. Cerpas, and A. Nuñez. 2018. Comparison of four serological  
24 methods and two reverse transcription-PCR assays for diagnosis and surveillance of  
25 Zika virus infection. *Journal of clinical microbiology* 56:
- 26 68. Stettler, K., M. Beltramello, D. A. Espinosa, V. Graham, A. Cassotta, S. Bianchi, F.  
27 Vanzetta, A. Minola, S. Jaconi, F. Mele, M. Foglierini, M. Pedotti, L. Simonelli, S. Dowall,  
28 B. Atkinson, E. Percivalle, C. P. Simmons, L. Varani, J. Blum, F. Baldanti, E. Camerini, R.  
29 Hewson, E. Harris, A. Lanzavecchia, F. Sallusto, and D. Corti. 2016. Specificity, cross-  
30 reactivity, and function of antibodies elicited by Zika virus infection. *Science* 353: 823-  
31 826.
- 32

## ACKNOWLEDGEMENTS

**General:** We thank the Veterinary Services, Colony Management, Scientific Protocol Implementation, and the Pathology Services staff at the Wisconsin National Primate Research Center (WNPRC) for their contributions to this study. We thank Brandy Russell for providing virus isolates. The following reagent was obtained through BEI Resources, NIAID, NIH: Dengue Virus Type 2, DENV-2/US/BID-V594/2006, NR-43280.

**Funding:** This work was supported by 5 R01AI132563-04 from the National Institute of Allergy and Infectious Disease and 5 P51OD011106-59 from the Office of the Director, NIH to the Wisconsin National Primate Research Center. Chelsea M. Crooks was supported by T32 AI007414 from the National Institute of Allergy and Infectious Disease.

### **Author contributions:**

C.M.C. contributed conceptualization, data curation, formal analysis, investigation, methodology, project administration, visualization, validation, writing – original draft, writing – review and editing

A.M.W. contributed data curation, investigation, validation, writing – review and editing

S.L.R. contributed data curation, investigation, validation, writing – review and editing

M.I.B. contributed data curation, investigation, validation, writing – review and editing

A.S.J. contributed investigation, writing – review and editing

M.E.M. contributed data curation, investigation, project administration, validation, writing – review and editing

H.A.S. contributed data curation, formal analysis, investigation, methodology, validation, writing – review and editing

A.M. contributed investigation, methodology, validation, writing – review and editing

M.K.F. contributed investigation, methodology, validation, writing – review and editing

J.M.H. contributed investigation, project administration, writing – review and editing

J.C.E. contributed formal investigation, methodology, software, visualization, writing – review and editing

A.M.M. contributed data curation, investigation, project administration, writing – review and editing

E.R. contributed study data curation, investigation, project administration, writing – review and editing

K.M.B. contributed investigation, writing – review and editing

E.A.B. contributed project administration, writing – review and editing

K.Y. contributed data curation, investigation, project administration, writing – review and editing

P.M.S. contributed data curation, investigation, project administration, writing – review and editing

A.P. contributed investigation, writing – review and editing

K.W. contributed investigation, writing – review and editing

75 K.M.A. formal analysis, investigation, writing – review and editing  
76 T.K.M. contributed data curation, formal analysis, investigation, methodology, writing –  
77 review and editing  
78 C.M.N. contributed conceptualization, methodology, writing – review and editing  
79 D.M.D. contributed conceptualization, methodology, project administration, writing – review  
80 and editing  
81 N.S-D. contributed investigation, project administration, writing – review and editing  
82 E.P. contributed investigation, project administration, writing – review and editing  
83 L.C.K. contributed methodology, project administration, writing – review and editing  
84 A.B. contributed data curation, methodology, writing – review and editing  
85 E.H. contributed methodology, project administration, writing – review and editing  
86 D.H.O. contributed conceptualization, data curation, funding acquisition, methodology,  
87 project administration, resources, software, supervision, writing – review and editing  
88 E.L.M. contributed conceptualization, data curation, funding acquisition, methodology,  
89 project administration, resources, supervision, writing – review and editing  
90 T.G.G. contributed conceptualization, data curation, funding acquisition, methodology,  
91 project administration, resources, supervision, writing – review and editing  
92 T.C.F. contributed conceptualization, data curation, funding acquisition, methodology,  
93 project administration, resources, supervision, writing – review and editing  
94 M.T.A. contributed conceptualization, data curation, funding acquisition, investigation,  
95 methodology, project administration, resources, supervision, writing – review and editing  
96

97 **Competing interests:** The authors declare no competing interests.  
98

99 **Data and materials availability:** All of the data used for figure generation and statistical  
00 analysis in this manuscript can also be found at [https://github.com/cmc0043/impact-of-](https://github.com/cmc0043/impact-of-denv-on-zikv-during-pregnancy-in-macaques)  
01 [denv-on-zikv-during-pregnancy-in-macaques](https://github.com/cmc0043/impact-of-denv-on-zikv-during-pregnancy-in-macaques). Primary data that support the findings of this  
02 study will be available in the future at the Zika Open Research Portal  
03 (<https://openresearch.labkey.com/project/ZEST/>). Data for the DENV-immune infected  
04 cohort can be found under study ZIKV-042; data for DENV-naïve and mock-infected cohorts  
05 can be found under ZIKV-044. Raw FASTQ reads of the challenge stock of DENV-2/US/BID-  
06 V594/2006 are available at the Sequence Read Archive, BioProject accession number  
07 PRJNA435432. Raw FASTQ reads of the challenge stock of ZIKV PRVABC59 are available  
08 at the Sequence Read Archive, BioProject accession number PRJNA392686. The authors  
09 declare that all other data supporting the findings of this study are available within the article  
10 and its supplementary information files.

## 11 **List of Supplementary Material**

12 Fig. S1. PRNT neutralization curves.

13 Fig. S2. Placental pathology scoring.

14 Table S1. Maternal and Fetal Tissue and Fluid ZIKV RNA Detection

15 Table S2. Placental Pathology Scoring System (central section)  
16
